# Supplementary material for: Actionable tests and treatments for patients with gastrointestinal cancers and historically short median survival times
Source: PubMed Central journal article supplement (PMC9629612; doi:10.1371/journal.pone.0276492), 2022-11-02
Supplement: pone.0276492.s001.pdf [file pone.0276492.s001.pdf]

| Pt # | Diagnosis | Gender | Age | Status       | Prior_Tx | WBC  | LY# | ANC  | MON# |
|------|-----------|--------|-----|--------------|----------|------|-----|------|------|
| 1    | Cholangio | M      | 74  | Deceased     | No       | 11.8 | 1.9 | 8.9  | 1.0  |
| 2    | Cholangio | F      | 66  | Deceased     | No       | 5.9  | 1.5 | 3.6  | 0.8  |
| 3    | Cholangio | F      | 71  | Deceased     | No       | 4.2  | 1.3 | 2.2  | 0.7  |
| 4    | Cholangio | M      | 87  | Deceased     | No       | 13.6 | 1.5 | 11.1 | 1.0  |
| 5    | Cholangio | M      | 72  | Censored     | No       | 12.2 | 2.1 | 9.1  | 1.0  |
| 6    | Cholangio | M      | 74  | Censored     | No       | 8.6  | 1.0 | 6.5  | 1.1  |
| 7    | Cholangio | M      | 67  | Still Living | No       | 8.2  | 1.8 | 5.3  | 0.9  |
| 8    | Cholangio | M      | 54  | Still Living | No       | 9.4  | 1.4 | 7.4  | 0.5  |
| 9    | Cholangio | F      | 65  | Deceased     | No       | 14.1 | 1.3 | 11.5 | 1.3  |
| 10   | Cholangio | F      | 76  | Censored     | No       | 7.3  | 2.0 | 5.1  | 0.2  |
| 11   | Cholangio | M      | 52  | Deceased     | No       | 18.2 | 2.3 | 15.0 | 0.9  |
| 12   | Cholangio | F      | 60  | Deceased     | No       | 7.3  | 3.1 | 4.5  | 0.3  |
| 13   | Cholangio | F      | 84  | Deceased     | No       | 9.3  | 2.2 | 6.8  | 0.3  |
| 14   | Cholangio | M      | 64  | Censored     | No       | 4.5  | 2.2 | 2.1  | 0.4  |
| 15   | Cholangio | M      | 82  | Censored     | No       | 12.3 | 1.3 | 10.8 | 0.2  |
| 16   | Cholangio | M      | 71  | Censored     | No       | 7.0  | 2.2 | 4.2  | 0.6  |
| 17   | Cholangio | F      | 64  | Deceased     | Yes      | 5.5  | 1.0 | 4.2  | 0.3  |
| 18   | Cholangio | F      | 54  | Censored     | Yes      | 4.3  | 1.0 | 3.0  | 0.3  |
| 19   | Cholangio | F      | 46  | Deceased     | Yes      | 6.7  | 2.3 | 3.7  | 0.6  |
| 20   | Cholangio | M      | 68  | Censored     | Yes      | 6.3  | 1.7 | 3.9  | 0.7  |
| 21   | Cholangio | M      | 71  | Censored     | Yes      | 6.6  | 1.0 | 5.1  | 0.4  |
| 22   | Cholangio | M      | 69  | Deceased     | Yes      | 11.4 | 1.5 | 9.2  | 0.7  |
| 23   | Cholangio | M      | 60  | Censored     | Yes      | 7.3  | 1.0 | 5.7  | 0.8  |
| 24   | Cholangio | F      | 70  | Censored     | Yes      | 7.3  | 1.3 | 5.5  | 0.5  |
| 25   | Cholangio | M      | 66  | Still Living | Yes      | 19.1 | 1.5 | 17.1 | 0.5  |
| 26   | Cholangio | F      | 65  | Censored     | Yes      | 11.5 | 2.1 | 8.0  | 0.7  |
| 27   | Cholangio | F      | 70  | Censored     | Yes      | 4.0  | 0.7 | 2.9  | 0.4  |
| 28   | Cholangio | F      | 83  | Deceased     | Yes      | 5.9  | 1.7 | 4.0  | 0.2  |
| 29   | Cholangio | F      | 46  | Deceased     | Yes      | 5.0  | 0.7 | 4.1  | 0.2  |
| 30   | Cholangio | F      | 86  | Deceased     | Yes      | 6.8  | 1.8 | 4.4  | 0.6  |
| 31   | Cholangio | M      | 57  | Deceased     | Yes      | 11.5 | 0.9 | 10.0 | 0.6  |
| 32   | Cholangio | M      | 43  | Still Living | Yes      | 5.8  | 2.2 | 4.0  | 0.3  |
| 33   | Cholangio | M      | 66  | Still Living | Yes      | 5.9  | 1.6 | 3.9  | 0.4  |
| 34   | Cholangio | F      | 57  | Censored     | Yes      | 10.6 | 1.1 | 9.1  | 0.5  |
| 35   | Cholangio | F      | 45  | Still Living | Yes      | 4.3  | 1.6 | 2.3  | 0.4  |
| 36   | Colon     | M      | 59  | Deceased     | No       | 8.7  | 1.4 | 6.8  | 0.4  |
| 37   | Colon     | M      | 70  | Deceased     | No       | 7.9  | 1.6 | 5.7  | 0.7  |
| 38   | Colon     | F      | 72  | Deceased     | No       | 5.7  | 1.9 | 3.4  | 0.4  |
| 39   | Colon     | F      | 70  | Deceased     | No       | 14.6 | 3.2 | 11.2 | 0.2  |
| 40   | Colon     | F      | 44  | Censored     | No       | 6.0  | 1.2 | 4.6  | 0.3  |
| 41   | Colon     | F      | 70  | Deceased     | No       | 9.6  | 2.0 | 7.3  | 0.3  |
| 42   | Colon     | F      | 42  | Deceased     | No       | 10.3 | 2.6 | 7    | 0.7  |
| 43   | Colon     | F      | 54  | Still Living | No       | 10.0 | 2.9 | 6.2  | 1    |
| 44   | Colon     | F      | 38  | Deceased     | No       | 8.7  | 1.7 | 6.6  | 0.4  |
| 45   | Colon     | M      | 72  | Censored     | No       | 8.7  | 2.0 | 6.4  | 0.3  |

|    |       |   |    |              |     |      |     |      |     |
|----|-------|---|----|--------------|-----|------|-----|------|-----|
| 46 | Colon | M | 61 | Still Living | No  | 10.0 | 1.6 | 7.9  | 0.4 |
| 47 | Colon | M | 52 | Deceased     | No  | 8.0  | 1.1 | 6.4  | 0.5 |
| 48 | Colon | F | 80 | Still Living | No  | 7.4  | 2.2 | 4.9  | 0.4 |
| 49 | Colon | M | 59 | Censored     | No  | 9.2  | 1.6 | 7.4  | 0.7 |
| 50 | Colon | M | 65 | Deceased     | Yes | 12.6 | 1.7 | 10.4 | 0.5 |
| 51 | Colon | M | 40 | Censored     | Yes | 5.5  | 2.2 | 3.1  | 0.1 |
| 52 | Colon | M | 66 | Deceased     | Yes | 7.7  | 1.3 | 6.1  | 0.3 |
| 53 | Colon | M | 44 | Deceased     | Yes | 5.5  | 2.3 | 3    | 0.3 |
| 54 | Colon | F | 43 | Deceased     | Yes | 5.2  | 1.2 | 3.6  | 0.4 |
| 55 | Colon | M | 39 | Deceased     | Yes | 5.4  | 1.7 | 3.1  | 0.6 |
| 56 | Colon | M | 59 | Censored     | Yes | 6.3  | 2.1 | 3.5  | 0.3 |
| 57 | Colon | M | 46 | Censored     | Yes | 8.0  | 1.3 | 6.5  | 0.2 |
| 58 | Colon | F | 64 | Deceased     | Yes | 5.6  | 0.6 | 4.7  | 0.3 |
| 59 | Colon | M | 54 | Still Living | Yes | 7.5  | 1.0 | 6.2  | 0.5 |
| 60 | Colon | F | 59 | Deceased     | Yes | 9.6  | 1.3 | 8.1  | 0.4 |
| 61 | Colon | F | 59 | Deceased     | Yes | 10.6 | 3.8 | 6.1  | 0.7 |
| 62 | Colon | M | 49 | Deceased     | Yes | 6.2  | 1.5 | 4.1  | 0.6 |
| 63 | Colon | F | 53 | Deceased     | Yes | 7.0  | 0.7 | 5.5  | 0.8 |
| 64 | Colon | M | 41 | Censored     | Yes | 5.7  | 0.8 | 4.3  | 0.6 |
| 65 | Colon | F | 38 | Deceased     | Yes | 11.6 | 3.5 | 7.2  | 0.9 |
| 66 | Colon | F | 55 | Deceased     | Yes | 8.9  | 1.4 | 7    | 0.5 |
| 67 | Colon | M | 66 | Censored     | Yes | 6.4  | 1.6 | 4.3  | 0.5 |
| 68 | Colon | M | 47 | Deceased     | Yes | 5.1  | 1.1 | 3.5  | 0.5 |
| 69 | Colon | M | 57 | Deceased     | Yes | 7.4  | 1.2 | 6.1  | 0.1 |
| 70 | Colon | M | 40 | Deceased     | Yes | 11.3 | 2.1 | 8.9  | 0.3 |
| 71 | Colon | M | 62 | Deceased     | Yes | 3.2  | 0.6 | 2.4  | 0.2 |
| 72 | Colon | M | 60 | Deceased     | Yes | 9.3  | 1.6 | 6.9  | 0.8 |
| 73 | Colon | F | 67 | Still Living | Yes | 22.0 | 2.9 | 18.5 | 0.6 |
| 74 | Colon | M | 59 | Deceased     | Yes | 7.1  | 1.3 | 5.4  | 0.4 |
| 75 | Colon | M | 51 | Still Living | Yes | 6.8  | 1.6 | 4.4  | 0.8 |
| 76 | Colon | F | 81 | Still Living | Yes | 3.8  | 1.0 | 2.5  | 0.3 |
| 77 | Colon | M | 75 | Deceased     | Yes | 18.8 | 2.6 | 16   | 0.2 |
| 78 | Colon | M | 53 | Deceased     | Yes | 3.9  | 0.9 | 2.9  | 0.3 |
| 79 | Colon | F | 65 | Deceased     | Yes | 4.3  | 1.0 | 3    | 0.3 |
| 80 | Colon | M | 51 | Deceased     | Yes | 6.7  | 1.7 | 4.4  | 0.6 |
| 81 | Colon | M | 53 | Censored     | Yes | 4.5  | 1.3 | 3    | 0.2 |
| 82 | Colon | F | 62 | Deceased     | Yes | 3.1  | 1.6 | 1    | 0.5 |
| 83 | Colon | F | 71 | Censored     | Yes | 16.0 | 2.4 | 12.2 | 1.4 |
| 84 | Colon | F | 53 | Deceased     | Yes | 7.4  | 1.0 | 6    | 0.4 |
| 85 | Colon | F | 61 | Censored     | Yes | 9.0  | 1.8 | 6.7  | 0.5 |
| 86 | Colon | M | 59 | Deceased     | Yes | 4.0  | 0.9 | 2.8  | 0.3 |
| 87 | Colon | F | 79 | Deceased     | Yes | 6.5  | 1.2 | 4.8  | 0.5 |
| 88 | Colon | M | 63 | Deceased     | Yes | 8.0  | 1.7 | 5.7  | 0.6 |

|     |         |   |    |              |     |      |     |      |     |
|-----|---------|---|----|--------------|-----|------|-----|------|-----|
| 89  | Colon   | M | 64 | Censored     | Yes | 5.5  | 1.7 | 3.5  | 0.3 |
| 90  | Colon   | F | 56 | Censored     | Yes | 7.5  | 1.4 | 5.4  | 0.7 |
| 91  | Colon   | F | 71 | Deceased     | Yes | 8.1  | 1.7 | 6.2  | 0.3 |
| 92  | Colon   | M | 56 | Deceased     | Yes | 6.0  | 1.3 | 4    | 0.6 |
| 93  | Colon   | F | 53 | Still Living | Yes | 8.9  | 2.2 | 6.6  | 0.2 |
| 94  | Colon   | F | 54 | Deceased     | Yes | 4.5  | 0.9 | 3.3  | 0.4 |
| 95  | Colon   | F | 58 | Censored     | Yes | 6.9  | 1.5 | 5.1  | 0.3 |
| 96  | Colon   | F | 70 | Deceased     | Yes | 8.6  | 2.7 | 5.2  | 0.7 |
| 97  | Colon   | M | 56 | Deceased     | Yes | 9.0  | 2.2 | 6.7  | 0.2 |
| 98  | Colon   | F | 67 | Deceased     | Yes | 5.1  | 1.6 | 3.1  | 0.4 |
| 99  | Colon   | F | 54 | Deceased     | Yes | 6.8  | 1.8 | 4.3  | 0.7 |
| 100 | Ovarian |   | 66 | Still Living | No  | 7.6  | 2.5 | 4.5  | 0.7 |
| 101 | Ovarian |   | 88 | Censored     | No  | 7.0  | 1.7 | 4.7  | 0.5 |
| 102 | Ovarian |   | 75 | Deceased     | No  | 13.6 | 1.4 | 33.1 | 0.1 |
| 103 | Ovarian |   | 47 | Censored     | No  | 6.8  | 1   | 5.6  | 0.2 |
| 104 | Ovarian |   | 60 | Deceased     | No  | 3.0  | 1.0 | 3.1  | 0.1 |
| 105 | Ovarian |   | 67 | Deceased     | No  | 4.6  | 1.4 | 2.8  | 0.4 |
| 106 | Ovarian |   | 74 | Deceased     | No  | 4.7  | 0.5 | 4.1  | 0.1 |
| 107 | Ovarian |   | 60 | Censored     | No  | 9.8  | 2.1 | 7.6  | 0.4 |
| 108 | Ovarian |   | 55 | Deceased     | No  | 5.7  | 1.6 | 3.8  | 0.3 |
| 109 | Ovarian |   | 55 | Censored     | No  | 7.2  | 1.9 | 4.8  | 0.3 |
| 110 | Ovarian |   | 59 | Deceased     | No  | 16.3 | 1.7 | 13.7 | 0.9 |
| 111 | Ovarian |   | 72 | Censored     | No  | 8.1  | 2.7 | 4.3  | 1.1 |
| 112 | Ovarian |   | 82 | Still Living | No  | 2.7  | 1.6 | 1.7  | 0.2 |
| 113 | Ovarian |   | 46 | Censored     | Yes | 3.7  | 1.4 | 1.9  | 0.3 |
| 114 | Ovarian |   | 41 | Deceased     | Yes | 3.1  | 0.8 | 2.1  | 0.2 |
| 115 | Ovarian |   | 65 | Still Living | Yes | 8.2  | 2.0 | 5.4  | 0.8 |
| 116 | Ovarian |   | 53 | Still Living | Yes | 6.5  | 1.8 | 4.4  | 0.5 |
| 117 | Ovarian |   | 50 | Deceased     | Yes | 8.3  | 1.5 | 5.9  | 1   |
| 118 | Ovarian |   | 77 | Deceased     | Yes | 5.8  | 1.6 | 3.6  | 0.5 |
| 119 | Ovarian |   | 68 | Deceased     | Yes | 9.5  | 2.1 | 6.7  | 0.7 |
| 120 | Ovarian |   | 73 | Deceased     | Yes | 8.3  | 2.2 | 6.0  | 0.1 |
| 121 | Ovarian |   | 67 | Deceased     | Yes | 6.3  | 1.6 | 4.4  | 0.3 |
| 122 | Ovarian |   | 72 | Censored     | Yes | 8.4  | 1.9 | 5.9  | 0.6 |
| 123 | Ovarian |   | 59 | Deceased     | Yes | 3.4  | 0.9 | 2.1  | 0.3 |
| 124 | Ovarian |   | 61 | Censored     | Yes | 7.2  | 0.9 | 5.8  | 0.4 |
| 125 | Ovarian |   | 59 | Deceased     | Yes | 19.4 | 1.3 | 17.7 | 0.4 |
| 126 | Ovarian |   | 70 | Still Living | Yes | 14.1 | 1.9 | 3.2  | 0.6 |
| 127 | Ovarian |   | 74 | Deceased     | Yes | 9.1  | 3.0 | 5.7  | 0.4 |
| 128 | Ovarian |   | 59 | Deceased     | Yes | 11.8 | 1.2 | 10.3 | 0.3 |
| 129 | Ovarian |   | 63 | Deceased     | Yes | 7.9  | 1.6 | 6.1  | 0.2 |
| 130 | Ovarian |   | 73 | Deceased     | Yes | 5.5  | 1.0 | 4.0  | 0.4 |
| 131 | Ovarian |   | 75 | Deceased     | Yes | 23.3 | 1.4 | 21.1 | 0.8 |
| 132 | Ovarian |   | 71 | Still Living | Yes | 2.9  | 0.6 | 2.1  | 0.3 |
| 133 | Ovarian |   | 45 | Deceased     | Yes | 2.5  | 0.5 | 1.8  | 0.4 |
| 134 | Ovarian |   | 74 | Deceased     | Yes | 7.5  | 2.2 | 5.3  | 0.7 |

|     |         |  |    |              |     |      |     |      |     |
|-----|---------|--|----|--------------|-----|------|-----|------|-----|
| 135 | Ovarian |  | 55 | Deceased     | Yes | 6.4  | 1.6 | 4.6  | 0.4 |
| 136 | Ovarian |  | 47 | Deceased     | Yes | 7.6  | 1.5 | 5.8  | 0.3 |
| 137 | Ovarian |  | 51 | Deceased     | Yes | 4.5  | 1.4 | 2.7  | 0.4 |
| 138 | Ovarian |  | 69 | Censored     | Yes | 5.6  | 1.8 | 3.5  | 0.3 |
| 139 | Ovarian |  | 65 | Deceased     | Yes | 1.7  | 0.8 | 0.7  | 0.2 |
| 140 | Ovarian |  | 66 | Deceased     | Yes | 4.6  | 1.3 | 3.2  | 0.4 |
| 141 | Ovarian |  | 63 | Censored     | Yes | 3.0  | 2.5 | 1.9  | 0.6 |
| 142 | Ovarian |  | 47 | Deceased     | Yes | 11.5 | 1.4 | 8.9  | 1.1 |
| 143 | Ovarian |  | 55 | Deceased     | Yes | 6.2  | 2.6 | 3.1  | 0.5 |
| 144 | Ovarian |  | 51 | Deceased     | Yes | 7.7  | 1.3 | 6.2  | 0.2 |
| 145 | Ovarian |  | 39 | Censored     | Yes | 7.0  | 1.0 | 5.5  | 0.4 |
| 146 | Ovarian |  | 72 | Censored     | Yes | 6.4  | 1.1 | 5.0  | 0.3 |
| 147 | Ovarian |  | 62 | Deceased     | Yes | 7.1  | 2.1 | 4.4  | 0.6 |
| 148 | Ovarian |  | 62 | Deceased     | Yes | 8.2  | 1.9 | 5.6  | 0.7 |
| 149 | Ovarian |  | 45 | Deceased     | Yes | 10.0 | 1.3 | 8.1  | 0.6 |
| 150 | Ovarian |  | 66 | Censored     | Yes | 10.1 | 2.6 | 7.3  | 0.3 |
| 151 | Ovarian |  | 59 | Censored     | Yes | 5.0  | 1.1 | 3.7  | 0.3 |
| 152 | Ovarian |  | 47 | Still Living | Yes | 10.1 | 2.2 | 7.2  | 0.7 |
| 153 | Ovarian |  | 51 | Deceased     | Yes | 14.8 | 3.8 | 9.2  | 1.9 |
| 154 | Ovarian |  | 66 | Deceased     | Yes | 6.8  | 1.5 | 5.0  | 0.3 |
| 155 | Ovarian |  | 56 | Deceased     | Yes | 4.7  | 0.8 | 3.5  | 0.4 |
| 156 | Ovarian |  | 71 | Still Living | Yes | 10.6 | 2.3 | 8    | 0.2 |
| 157 | Ovarian |  | 48 | Deceased     | Yes | 4.9  | 1.5 | 3.0  | 0.4 |
| 158 | Ovarian |  | 73 | Deceased     | Yes | 11.2 | 1.5 | 9.7  | 0.5 |
| 159 | Ovarian |  | 70 | Deceased     | Yes | 2.5  | 1   | 1.5  | 0.1 |
| 160 | Ovarian |  | 59 | Deceased     | Yes | 3    | 0.9 | 2    | 0.1 |
| 161 | Ovarian |  | 68 | Deceased     | Yes | 12.0 | 1.9 | 9.1  | 1.1 |
| 162 | Ovarian |  | 74 | Censored     | Yes | 8.0  | 2.1 | 5.2  | 0.7 |
| 163 | Ovarian |  | 69 | Censored     | Yes | 2.4  | 0.6 | 1.6  | 0.1 |
| 164 | Ovarian |  | 76 | Deceased     | Yes | 9.5  | 2.7 | 6.3  | 0.4 |
| 165 | Ovarian |  | 52 | Deceased     | Yes | 4.8  | 1.4 | 3.1  | 0.4 |
| 166 | Ovarian |  | 64 | Deceased     | Yes | 9.3  | 3.2 | 5.4  | 0.7 |
| 167 | Ovarian |  | 48 | Deceased     | Yes | 7.4  | 1.5 | 5.6  | 0.3 |
| 168 | Ovarian |  | 58 | Deceased     | Yes | 4.0  | 1.1 | 2.7  | 0.3 |
| 169 | Ovarian |  | 66 | Deceased     | Yes | 2.8  | 1.6 | 0.9  | 0.4 |
| 170 | Ovarian |  | 68 | Deceased     | Yes | 5.0  | 1.2 | 3.7  | 0.2 |
| 171 | Ovarian |  | 76 | Still Living | Yes | 15.8 | 2   | 12.9 | 0.9 |
| 172 | Ovarian |  | 54 | Deceased     | Yes | 4.0  | 0.7 | 3.0  | 0.3 |
| 173 | Ovarian |  | 66 | Deceased     | Yes | 12.1 | 1.7 | 9.5  | 0.9 |
| 174 | Ovarian |  | 37 | Censored     | Yes | 4.2  | 1.1 | 2.8  | 0.3 |
| 175 | Ovarian |  | 59 | Deceased     | Yes | 34.4 | 3.4 | 29.7 | 0.6 |
| 176 | Ovarian |  | 50 | Censored     | Yes | 4.8  | 0.7 | 3.8  | 0.3 |
| 177 | Ovarian |  | 44 | Deceased     | Yes | 5.4  | 1.4 | 3.4  | 0.5 |
| 178 | Ovarian |  | 50 | Deceased     | Yes | 8.3  | 1.2 | 6.5  | 0.6 |
| 179 | Ovarian |  | 55 | Deceased     | Yes | 3.6  | 1.1 | 2.4  | 0.1 |
| 180 | Ovarian |  | 35 | Deceased     | Yes | 7.4  | 1.4 | 5.6  | 0.4 |
| 181 | Ovarian |  | 64 | Deceased     | Yes | 15.2 | 1.7 | 12.6 | 0.7 |

|     |            |   |    |              |     |      |     |      |     |
|-----|------------|---|----|--------------|-----|------|-----|------|-----|
| 182 | Ovarian    |   | 61 | Deceased     | Yes | 18.4 | 1.5 | 15.9 | 0.9 |
| 183 | Ovarian    |   | 69 | Censored     | Yes | 6.0  | 1.6 | 4.1  | 0.6 |
| 184 | Ovarian    |   | 36 | Deceased     | Yes | 6.7  | 1.9 | 4.4  | 0.4 |
| 185 | Ovarian    |   | 61 | Deceased     | Yes | 8.1  | 3.5 | 3.9  | 0.8 |
| 186 | Ovarian    |   | 47 | Deceased     | Yes | 6.9  | 2.3 | 4.4  | 0.2 |
| 187 | Ovarian    |   | 71 | Deceased     | Yes | 15.0 | 1.7 | 12.4 | 0.9 |
| 188 | Ovarian    |   | 82 | Deceased     | Yes | 24.5 | 2.1 | 21.1 | 1.3 |
| 189 | Ovarian    |   | 71 | Deceased     | Yes | 4.5  | 1.5 | 2.7  | 0.2 |
| 190 | Ovarian    |   | 68 | Deceased     | Yes | 4.6  | 0.8 | 3.5  | 0.4 |
| 191 | Ovarian    |   | 67 | Censored     | Yes | 5.7  | 1.0 | 4.5  | 0.2 |
| 192 | Ovarian    |   | 61 | Deceased     | Yes | 7.2  | 1.6 | 5.2  | 0.4 |
| 193 | Ovarian    |   | 58 | Deceased     | Yes | 5.5  | 1.2 | 4.8  | 0.2 |
| 194 | Ovarian    |   | 63 | Deceased     | Yes | 11.5 | 1.9 | 9.4  | 0.2 |
| 195 | Ovarian    |   | 45 | Still Living | Yes | 2.1  | 1.2 | 1.3  | 0.1 |
| 196 | Ovarian    |   | 63 | Deceased     | Yes | 11.8 | 3.1 | 7.8  | 0.3 |
| 197 | Ovarian    |   | 65 | Deceased     | Yes | 8.2  | 1.7 | 5.7  | 0.7 |
| 198 | Ovarian    |   | 55 | Deceased     | Yes | 9.8  | 1.9 | 7.2  | 0.6 |
| 199 | Ovarian    |   | 60 | Deceased     | Yes | 5.0  | 1.3 | 3.7  | 0.2 |
| 200 | Ovarian    |   | 45 | Still Living | Yes | 7.5  | 3.2 | 3.9  | 0.4 |
| 201 | Ovarian    |   | 49 | Deceased     | Yes | 3.2  | 1.1 | 2.1  | 0.3 |
| 202 | Pancreatic | F | 83 | Deceased     | No  | 7.6  | 1.2 | 4.4  | 0.6 |
| 203 | Pancreatic | F | 54 | Deceased     | No  | 5.5  | 1.7 | 3.5  | 0.3 |
| 204 | Pancreatic | M | 65 | Deceased     | No  | 9.5  | 1.6 | 7.1  | 0.8 |
| 205 | Pancreatic | F | 61 | Deceased     | No  | 7.9  | 1.6 | 5.8  | 0.5 |
| 206 | Pancreatic | M | 80 | Censored     | No  | 7.7  | 1.8 | 5.4  | 0.5 |
| 207 | Pancreatic | M | 73 | Deceased     | No  | 9.3  | 1.2 | 7.5  | 0.8 |
| 208 | Pancreatic | M | 70 | Still Living | No  | 10.1 | 1.6 | 8    | 0.5 |
| 209 | Pancreatic | M | 73 | Deceased     | No  | 16.9 | 1.5 | 14.5 | 0.9 |
| 210 | Pancreatic | M | 67 | Deceased     | No  | 5.6  | 1.2 | 4.1  | 0.3 |
| 211 | Pancreatic | F | 64 | Deceased     | No  | 7.5  | 1.9 | 5.2  | 0.4 |
| 212 | Pancreatic | M | 72 | Deceased     | No  | 6.1  | 1.2 | 4.5  | 0.4 |
| 213 | Pancreatic | M | 59 | Deceased     | No  | 8.2  | 1.6 | 6.2  | 0.5 |
| 214 | Pancreatic | M | 74 | Deceased     | No  | 13.7 | 1.4 | 11.4 | 0.9 |
| 215 | Pancreatic | M | 67 | Deceased     | No  | 11.4 | 2.8 | 7.7  | 0.9 |
| 216 | Pancreatic | F | 70 | Censored     | No  | 15.0 | 3.7 | 10.9 | 0.4 |
| 217 | Pancreatic | F | 71 | Deceased     | No  | 4.3  | 1.6 | 2.3  | 0.4 |
| 218 | Pancreatic | M | 79 | Deceased     | No  | 6.3  | 1.1 | 4.7  | 0.5 |
| 219 | Pancreatic | M | 52 | Deceased     | No  | 9.8  | 2.2 | 7.4  | 0.2 |
| 220 | Pancreatic | M | 57 | Deceased     | No  | 9.0  | 1.4 | 6.9  | 0.7 |
| 221 | Pancreatic | F | 60 | Deceased     | No  | 7.4  | 2.8 | 4.4  | 0.2 |
| 222 | Pancreatic | M | 81 | Deceased     | No  | 15.0 | 0.7 | 13.9 | 0.4 |
| 223 | Pancreatic | M | 72 | Censored     | No  | 11.6 | 1.6 | 9.9  | 0.1 |
| 224 | Pancreatic | M | 62 | Deceased     | No  | 12.6 | 1.7 | 10.5 | 1.1 |
| 225 | Pancreatic | M | 72 | Deceased     | No  | 6.4  | 1.3 | 4.5  | 0.6 |
| 226 | Pancreatic | M | 53 | Deceased     | No  | 11.4 | 2.8 | 7.8  | 0.7 |
| 227 | Pancreatic | M | 73 | Still Living | No  | 7.6  | 1.1 | 6.2  | 0.2 |

|     |            |   |    |              |     |      |     |      |     |
|-----|------------|---|----|--------------|-----|------|-----|------|-----|
| 228 | Pancreatic | M | 61 | Deceased     | No  | 11.2 | 1.6 | 8.7  | 0.9 |
| 229 | Pancreatic | F | 78 | Deceased     | No  | 8.6  | 2.5 | 5.7  | 0.4 |
| 230 | Pancreatic | M | 70 | Censored     | No  | 15.3 | 1.4 | 13.2 | 0.8 |
| 231 | Pancreatic | F | 66 | Deceased     | No  | 4.3  | 1.3 | 2.7  | 0.3 |
| 232 | Pancreatic | M | 51 | Deceased     | No  | 4.4  | 1.2 | 2.7  | 0.5 |
| 233 | Pancreatic | F | 66 | Censored     | No  | 8.2  | 2.0 | 5.6  | 0.6 |
| 234 | Pancreatic | F | 65 | Deceased     | No  | 6.5  | 1.9 | 4.2  | 0.4 |
| 235 | Pancreatic | F | 75 | Still Living | No  | 8.3  | 1.4 | 6.3  | 0.6 |
| 236 | Pancreatic | F | 69 | Deceased     | No  | 5.4  | 1.6 | 3.5  | 0.3 |
| 237 | Pancreatic | M | 63 | Deceased     | No  | 8.3  | 2.2 | 4.6  | 0.9 |
| 238 | Pancreatic | M | 75 | Deceased     | No  | 10.9 | 1.8 | 8.5  | 0.5 |
| 239 | Pancreatic | M | 81 | Censored     | No  | 10.8 | 2.0 | 8.4  | 0.4 |
| 240 | Pancreatic | M | 64 | Deceased     | No  | 5.6  | 1.3 | 3.8  | 0.5 |
| 241 | Pancreatic | F | 77 | Deceased     | No  | 15.4 | 1.3 | 13.9 | 0.2 |
| 242 | Pancreatic | M | 58 | Deceased     | No  | 10.0 | 0.9 | 8.7  | 0.4 |
| 243 | Pancreatic | M | 39 | Deceased     | No  | 7.7  | 1.2 | 6.3  | 0.3 |
| 244 | Pancreatic | M | 50 | Deceased     | No  | 6.9  | 1.9 | 4.6  | 0.5 |
| 245 | Pancreatic | M | 84 | Censored     | No  | 7.2  | 1.4 | 5.5  | 0.3 |
| 246 | Pancreatic | F | 68 | Still Living | No  | 4.1  | 0.8 | 3.0  | 0.3 |
| 247 | Pancreatic | M | 63 | Deceased     | No  | 7.4  | 2.8 | 3.9  | 0.7 |
| 248 | Pancreatic | F | 50 | Censored     | No  | 14.2 | 3.1 | 10.2 | 0.9 |
| 249 | Pancreatic | F | 65 | Censored     | No  | 5.6  | 2.0 | 3.3  | 0.3 |
| 250 | Pancreatic | F | 63 | Deceased     | No  | 9.1  | 1.8 | 6.9  | 0.4 |
| 251 | Pancreatic | F | 64 | Still Living | No  | 3.9  | 1.2 | 2.4  | 0.3 |
| 252 | Pancreatic | M | 85 | Censored     | No  | 6.6  | 1.4 | 4.5  | 0.7 |
| 253 | Pancreatic | M | 61 | Deceased     | No  | 10.2 | 1.9 | 7.7  | 0.6 |
| 254 | Pancreatic | M | 59 | Deceased     | No  | 9.5  | 1.0 | 7.8  | 0.7 |
| 255 | Pancreatic | M | 60 | Deceased     | Yes | 6.4  | 1.8 | 4.5  | 0.1 |
| 256 | Pancreatic | M | 66 | Censored     | Yes | 6.3  | 1.7 | 3.7  | 0.6 |
| 257 | Pancreatic | F | 71 | Deceased     | Yes | 7.6  | 1.4 | 5.8  | 0.4 |
| 258 | Pancreatic | F | 76 | Censored     | Yes | 9.5  | 0.7 | 8.3  | 0.6 |
| 259 | Pancreatic | M | 83 | Deceased     | Yes | 10.4 | 2.0 | 8.1  | 0.3 |
| 260 | Pancreatic | F | 76 | Deceased     | Yes | 16.9 | 1.6 | 14.7 | 0.6 |
| 261 | Pancreatic | F | 77 | Censored     | Yes | 7.1  | 1.2 | 5.3  | 0.6 |
| 262 | Pancreatic | F | 69 | Deceased     | Yes | 8.8  | 2.2 | 6.0  | 0.6 |
| 263 | Pancreatic | M | 42 | Deceased     | Yes | 7.0  | 1.2 | 5.2  | 0.5 |
| 264 | Pancreatic | M | 77 | Deceased     | Yes | 5.1  | 2.3 | 3.4  | 1.0 |
| 265 | Pancreatic | M | 67 | Deceased     | Yes | 4.4  | 1.0 | 3.2  | 0.2 |
| 266 | Pancreatic | M | 69 | Censored     | Yes | 2.9  | 0.9 | 1.7  | 0.3 |
| 267 | Pancreatic | F | 79 | Still Living | Yes | 8.7  | 2.3 | 6.0  | 0.3 |
| 268 | Pancreatic | M | 42 | Deceased     | Yes | 73.3 | 1.5 | 71.7 | 0.1 |
| 269 | Pancreatic | F | 83 | Still Living | Yes | 8.1  | 2.7 | 5.0  | 0.4 |
| 270 | Pancreatic | F | 50 | Deceased     | Yes | 3.3  | 1.1 | 1.9  | 0.3 |
| 271 | Pancreatic | F | 64 | Censored     | Yes | 6.9  | 0.9 | 5.5  | 0.4 |
| 272 | Pancreatic | M | 62 | Deceased     | Yes | 12.5 | 0.9 | 8.6  | 1.2 |
| 273 | Pancreatic | M | 79 | Deceased     | Yes | 9.5  | 3.6 | 5.5  | 0.5 |
| 274 | Pancreatic | M | 74 | Deceased     | Yes | 7.4  | 1.1 | 5.8  | 0.4 |

|     |            |   |    |              |     |      |     |      |     |
|-----|------------|---|----|--------------|-----|------|-----|------|-----|
| 275 | Pancreatic | M | 62 | Deceased     | Yes | 6.0  | 1.7 | 4.2  | 0.1 |
| 276 | Pancreatic | F | 60 | Deceased     | Yes | 7.9  | 1.4 | 5.9  | 0.6 |
| 277 | Pancreatic | F | 58 | Deceased     | Yes | 6.4  | 0.8 | 4.7  | 0.5 |
| 278 | Pancreatic | F | 61 | Still Living | Yes | 3.3  | 0.9 | 2.2  | 0.1 |
| 279 | Pancreatic | F | 41 | Deceased     | Yes | 8.6  | 1.9 | 6.1  | 0.6 |
| 280 | Pancreatic | M | 64 | Still Living | Yes | 4.8  | 1.6 | 2.9  | 0.4 |
| 281 | Pancreatic | M | 64 | Censored     | Yes | 8.2  | 1.0 | 6.7  | 0.5 |
| 282 | Pancreatic | F | 67 | Deceased     | Yes | 8.3  | 0.6 | 7.4  | 0.3 |
| 283 | Pancreatic | F | 51 | Deceased     | Yes | 7.1  | 0.9 | 5.9  | 0.3 |
| 284 | Pancreatic | F | 63 | Deceased     | Yes | 4.5  | 2   | 2.2  | 0.4 |
| 285 | Pancreatic | F | 73 | Deceased     | Yes | 4.6  | 1.9 | 2.2  | 0.5 |
| 286 | Pancreatic | M | 63 | Deceased     | Yes | 7.1  | 0.4 | 6.6  | 0.1 |
| 287 | Pancreatic | F | 69 | Deceased     | Yes | 5.9  | 0.8 | 4.9  | 0.2 |
| 288 | Pancreatic | F | 73 | Deceased     | Yes | 6.3  | 1.2 | 4.7  | 0.4 |
| 289 | Pancreatic | M | 68 | Censored     | Yes | 8.3  | 0.6 | 7.5  | 0.2 |
| 290 | Pancreatic | F | 61 | Deceased     | Yes | 4.3  | 0.4 | 3.9  | 0.1 |
| 291 | Pancreatic | F | 51 | Deceased     | Yes | 4.4  | 1.4 | 2.7  | 0.2 |
| 292 | Pancreatic | M | 66 | Deceased     | Yes | 9.2  | 2.2 | 6.3  | 0.3 |
| 293 | Pancreatic | F | 66 | Censored     | Yes | 6.1  | 1.1 | 4.7  | 0.3 |
| 294 | Pancreatic | M | 64 | Deceased     | Yes | 7.6  | 1.6 | 5.6  | 0.4 |
| 295 | Pancreatic | F | 55 | Censored     | Yes | 10.9 | 1.3 | 9.2  | 0.4 |
| 296 | Pancreatic | M | 71 | Deceased     | Yes | 9.3  | 2   | 6.8  | 0.5 |
| 297 | Pancreatic | M | 47 | Censored     | Yes | 6.0  | 1.9 | 3.7  | 0.4 |
| 298 | Pancreatic | M | 65 | Deceased     | Yes | 15.4 | 1.3 | 12.6 | 1.5 |
| 299 | Pancreatic | M | 78 | Censored     | Yes | 23.9 | 1.8 | 21.2 | 0.9 |
| 300 | Pancreatic | F | 74 | Censored     | Yes | 6.9  | 2.0 | 4.1  | 0.8 |
| 301 | Pancreatic | F | 84 | Censored     | Yes | 9.9  | 2.5 | 7.0  | 0.3 |
| 302 | Pancreatic | M | 60 | Deceased     | Yes | 7.3  | 1.0 | 5.8  | 0.5 |
| 303 | Pancreatic | F | 52 | Deceased     | Yes | 26.5 | 3.3 | 22.2 | 1.0 |
| 304 | Pancreatic | M | 61 | Deceased     | Yes | 9.2  | 1.8 | 7.1  | 0.3 |
| 305 | Pancreatic | F | 67 | Deceased     | Yes | 3.9  | 1   | 2.8  | 0.2 |
| 306 | Pancreatic | F | 75 | Censored     | Yes | 6.5  | 0.6 | 5.4  | 0.5 |
| 307 | Pancreatic | M | 70 | Censored     | Yes | 5.1  | 1.2 | 3.7  | 0.2 |

| HGB  | HCT  | PLT   | Albumin | Alk_Phos | Bilirubin | LMR  | NLR  | TP  | AS |
|------|------|-------|---------|----------|-----------|------|------|-----|----|
| 11.0 | 34.7 | 362.0 | 3.4     | 461.0    | 0.7       | 1.9  | 4.7  | 7.4 | 4  |
| 11.7 | 34.7 | 246.0 | 4.0     | 100.0    | 0.4       | 1.9  | 2.4  | 6.5 | 1  |
| 9.2  | 28.3 | 184.0 | 3.4     | 578.0    | 1.0       | 1.9  | 1.7  | 6.3 | 2  |
| 8.7  | 28.5 | 708.0 | 1.2     | 67.0     | 0.5       | 1.5  | 7.4  | 6.7 | 4  |
| 11.4 | 34.3 | 289.0 | 3.1     | 498.0    | 8.5       | 2.1  | 4.3  | 6.8 | 3  |
| 11.0 | 37.6 | 246.0 | 2.1     | 495.0    | 0.7       | 0.9  | 6.5  | 5.4 | 3  |
| 15.4 | 46.0 | 210.0 | 4.2     | 199.0    | 1.3       | 2.0  | 2.9  | 6.9 | 1  |
| 11.9 | 36.9 | 480.0 | 3.8     | 374.0    | 3.4       | 2.8  | 5.3  | 7.1 | 1  |
| 11.5 | 36.0 | 321.0 | 3.5     | 456.0    | 2.8       | 1.0  | 8.8  | 6.3 | 3  |
| 14.1 | 42.0 | 517.0 | 4.3     | 59.0     | 0.4       | 10.0 | 2.6  | 7.1 | 0  |
| 14.0 | 42.7 | 343.0 | 10.7    | 493.0    | 10.9      | 2.6  | 6.5  | 6.1 | 2  |
| 15.3 | 49.1 | 188.0 | 4.6     | 92.0     | 0.9       | 10.3 | 1.5  | 7.5 | 0  |
| 13.2 | 40.8 | 371.0 | 4.0     | 169.0    | 0.5       | 7.3  | 3.1  | 6.5 | 1  |
| 13.8 | 41.2 | 127.0 | 4.2     | 83.0     | 0.2       | 5.5  | 1.0  | 7.7 | 0  |
| 11.4 | 34.4 | 103.0 | 3.8     | 188.0    | 1.0       | 6.5  | 8.3  | 7.0 | 2  |
| 11.1 | 32.5 | 347.0 | 4.0     | 253.0    | 1.7       | 3.7  | 1.9  | 7.0 | 0  |
| 14.9 | 43.5 | 125.0 | 4.5     | 50.0     | 0.7       | 3.3  | 4.2  | 7.0 | 1  |
| 10.5 | 31.0 | 152.0 | 4.0     | 43.0     | 0.6       | 3.3  | 3.0  | 6.2 | 0  |
| 11.1 | 35.7 | 228.0 | 4.3     | 158.0    | 0.3       | 3.8  | 1.6  | 7.2 | 0  |
| 12.7 | 38.5 | 87.0  | 4.2     | 84.0     | 0.5       | 2.4  | 2.3  | 7.1 | 0  |
| 9.6  | 29.7 | 189.0 | 3.3     | 421.0    | 2.1       | 2.5  | 5.1  | 6.0 | 2  |
| 10.8 | 36.6 | 204.0 | 3.5     | 185.0    | 0.7       | 2.1  | 6.1  | 6.1 | 2  |
| 11.4 | 35.0 | 86.0  | 2.3     | 482.0    | 5.2       | 1.3  | 5.7  | 6.3 | 3  |
| 10.9 | 31.8 | 179.0 | 5.2     | 129.0    | 1.0       | 2.6  | 4.2  | 7.1 | 1  |
| 10.1 | 29.3 | 58.0  | 4.2     | 228.0    | 0.3       | 3.0  | 11.4 | 7.5 | 2  |
| 11.8 | 38.1 | 427.0 | 4.1     | 97.0     | 0.6       | 3.0  | 3.8  | 6.8 | 1  |
| 11.7 | 36.5 | 101.0 | 3.7     | 60.0     | 0.9       | 1.8  | 4.1  | 6.9 | 2  |
| 13.6 | 40.1 | 123.0 | 4.0     | 59.0     | 0.4       | 8.5  | 2.4  | 6.1 | 0  |
| 12.8 | 41.5 | 309.0 | 4.5     | 261.0    | 0.5       | 3.5  | 5.9  | 8.3 | 1  |
| 12.9 | 40.4 | 157.0 | 3.7     | 69.0     | 0.6       | 3.0  | 2.4  | 6.7 | 0  |
| 12.0 | 36.1 | 97.0  | 2.5     | 248.0    | 1.6       | 1.5  | 11.1 | 5.7 | 4  |
| 13.6 | 41.3 | 205.0 | 4.1     | 64.0     | 0.8       | 7.3  | 1.8  | 6.7 | 0  |
| 9.8  | 31.1 | 277.0 | 3.5     | 257.0    | 2.3       | 4.0  | 2.4  | 6.4 | 0  |
| 9.4  | 28.9 | 135.0 | 1.6     | 93.0     | 0.4       | 2.2  | 8.3  | 8.1 | 3  |
| 11.1 | 34.1 | 254.0 | 4.0     | 154.0    | 0.7       | 4.0  | 1.4  | 7.5 | 0  |
| 12.5 | 39.6 | 354.0 | 4.3     | 142.0    | 0.5       | 3.5  | 4.9  | 7.8 | 1  |
| 8.6  | 27.4 | 502.0 | 3.7     | 68.0     | 0.2       | 2.3  | 3.6  | 6.7 | 1  |
| 11.6 | 38.3 | 194.0 | 4.2     | 116.0    | 0.3       | 4.8  | 1.8  | 7.4 | 0  |
| 10.7 | 33.9 | 169.0 | 2.9     | 244.0    | 0.4       | 16.0 | 3.5  | 6.8 | 3  |
| 9.9  | 32.2 | 364.0 | 4.1     | 126.0    | 0.3       | 4.0  | 3.8  | 7.5 | 1  |
| 12.8 | 39.6 | 216.0 | 4.0     | 80.0     | 0.6       | 6.7  | 3.7  | 6.7 | 1  |
| 12.1 | 38.2 | 452.0 | 3.9     | 108.0    | 0.3       | 3.7  | 2.7  | 6.7 | 0  |
| 12.3 | 37.6 | 384.0 | 3.9     | 90.0     | 0.4       | 2.9  | 2.1  | 7.2 | 0  |
| 10.8 | 34.7 | 406.0 | 4.2     | 86.0     | 0.2       | 4.3  | 3.9  | 6.8 | 1  |
| 14.9 | 42.0 | 180.0 | 4.4     | 66.0     | 0.9       | 6.7  | 3.2  | 7.4 | 1  |



|      |      |       |     |       |     |      |     |     |   |
|------|------|-------|-----|-------|-----|------|-----|-----|---|
| 14.0 | 42.8 | 213.0 | 3.6 | 131.0 | 0.8 | 4.0  | 4.9 | 7.8 | 1 |
| 12.2 | 37.9 | 197.0 | 4.0 | 281.0 | 1.2 | 2.2  | 5.8 | 7.1 | 1 |
| 11.5 | 35.1 | 149.0 | 4.1 | 90.0  | 0.2 | 5.5  | 2.2 | 6.9 | 0 |
| 12.0 | 36.4 | 373.0 | 3.6 | 118.0 | 0.3 | 2.3  | 4.6 | 6.3 | 1 |
| 11.4 | 35.6 | 448.0 | 2.7 | 186.0 | 0.6 | 3.4  | 6.1 | 6.3 | 3 |
| 15.1 | 46.1 | 191.0 | 5.0 | 43.0  | 0.9 | 22.0 | 1.4 | 7.3 | 0 |
| 11.5 | 37.1 | 350.0 | 3.8 | 103.0 | 0.4 | 4.3  | 4.7 | 6.9 | 1 |
| 14.2 | 44.5 | 176.0 | 5.0 | 72.0  | 0.4 | 7.7  | 1.3 | 7.2 | 0 |
| 12.3 | 37.5 | 132.0 | 4.0 | 130.0 | 0.6 | 3.0  | 3.0 | 6.8 | 0 |
| 13.2 | 39.8 | 284.0 | 3.9 | 188.0 | 0.4 | 2.8  | 1.8 | 6.9 | 0 |
| 13.0 | 39.7 | 178.0 | 4.2 | 97.0  | 0.7 | 7.0  | 1.7 | 6.9 | 0 |
| 10.1 | 32.3 | 251.0 | 3.1 | 54.0  | 0.2 | 6.5  | 5.0 | 6.1 | 2 |
| 12.5 | 37.4 | 313.0 | 3.8 | 69.0  | 0.5 | 2.0  | 7.8 | 6.9 | 2 |
| 12.1 | 38.1 | 285.0 | 2.5 | 830.0 | 4.6 | 2.0  | 6.2 | 6.8 | 3 |
| 9.9  | 29.8 | 73.0  | 2.6 | 615.0 | 1.3 | 3.3  | 6.2 | 5.8 | 3 |
| 11.1 | 34.9 | 193.0 | 4.0 | 171.0 | 0.3 | 5.4  | 1.6 | 7.5 | 0 |
| 12.0 | 37.1 | 409.0 | 4.5 | 115.0 | 0.1 | 2.5  | 2.7 | 7.7 | 0 |
| 11.0 | 36.7 | 209.0 | 2.5 | 465.0 | 7.7 | 0.9  | 7.9 | 6.2 | 3 |
| 11.1 | 34.5 | 228.0 | 4.1 | 560.0 | 0.5 | 1.3  | 5.4 | 7.2 | 2 |
| 11.5 | 36.8 | 433.0 | 3.6 | 345.0 | 0.8 | 3.9  | 2.1 | 8.9 | 0 |
| 12.7 | 40.9 | 267.0 | 4.4 | 137.0 | 0.5 | 2.8  | 5.0 | 7.6 | 1 |
| 13.8 | 41.9 | 241.0 | 3.5 | 138.0 | 1.1 | 3.2  | 2.7 | 6.8 | 0 |
| 13.0 | 38.7 | 225.0 | 3.9 | 167.0 | 0.7 | 2.2  | 3.2 | 7.1 | 1 |
| 15.1 | 45.5 | 209.0 | 4.4 | 71.0  | 0.4 | 12.0 | 5.1 | 7   | 1 |
| 16.0 | 47.5 | 212.0 | 4.7 | 122.0 | 0.5 | 7.0  | 4.2 | 7.4 | 2 |
| 11.2 | 36.0 | 193.0 | 3.6 | 135.0 | 0.5 | 3.0  | 4.0 | 6.4 | 1 |
| 10.1 | 30.6 | 389.0 | 2.9 | 653.0 | 1.4 | 2.0  | 4.3 | 6.9 | 3 |
| 8.5  | 26.5 | 666.0 | 2.6 | 120.0 | 0.4 | 4.8  | 6.4 | 5.5 | 3 |
| 12.0 | 36.5 | 262.0 | 3.8 | 75.0  | 0.5 | 3.3  | 4.2 | 6.5 | 1 |
| 11.5 | 36.4 | 282.0 | 3.9 | 175.0 | 0.3 | 2.0  | 2.8 | 7.5 | 1 |
| 9.8  | 31.6 | 83.0  | 3.6 | 382.0 | 0.4 | 3.3  | 2.5 | 6.2 | 0 |
| 10.8 | 33.3 | 543.0 | 2.8 | 366.0 | 2.2 | 13.0 | 6.2 | 6.2 | 3 |
| 9.9  | 31.7 | 490.0 | 2.7 | 125.0 | 0.6 | 3.0  | 3.2 | 6.1 | 2 |
| 11.9 | 36.3 | 252.0 | 4.2 | 63.0  | 0.4 | 3.3  | 3.0 | 6.8 | 0 |
| 12.8 | 39.1 | 285.0 | 3.9 | 231.0 | 0.6 | 2.8  | 2.6 | 6.6 | 0 |
| 13.4 | 43.1 | 273.0 | 3.5 | 70.0  | 0.2 | 6.5  | 2.3 | 6.3 | 0 |
| 9.9  | 32.7 | 257.0 | 3.9 | 186.0 | 0.4 | 3.2  | 0.6 | 7.6 | 0 |
| 11.6 | 34.9 | 104.0 | 3.5 | 122.0 | 0.6 | 1.7  | 5.1 | 6.7 | 3 |
| 11.8 | 36.7 | 295.0 | 4.0 | 55.0  | 0.6 | 2.5  | 6.0 | 6.5 | 1 |
| 7.0  | 21.7 | 503.0 | 3.8 | 86.0  | 0.2 | 3.6  | 3.7 | 6.1 | 1 |
| 12.8 | 39.3 | 113.0 | 3.3 | 260.0 | 1.1 | 3.0  | 3.1 | 6.3 | 2 |
| 12.0 | 35.4 | 115.0 | 3.7 | 257.0 | 0.7 | 2.4  | 4.0 | 6.9 | 1 |
| 13.0 | 39.5 | 340.0 | 3.5 | 175.0 | 0.5 | 2.8  | 3.4 | 5.4 | 1 |

|      |      |       |     |       |     |      |      |     |   |
|------|------|-------|-----|-------|-----|------|------|-----|---|
| 11.4 | 35.9 | 218.0 | 3.5 | 112.0 | 0.7 | 5.7  | 2.1  | 6.8 | 0 |
| 11.4 | 35.1 | 193.0 | 3.2 | 201.0 | 0.6 | 2.0  | 3.9  | 6.5 | 3 |
| 12.1 | 39.0 | 375.0 | 4.2 | 133.0 | 0.5 | 5.7  | 3.6  | 6.9 | 1 |
| 12.5 | 36.2 | 251.0 | 3.8 | 485.0 | 0.3 | 2.2  | 3.1  | 6.1 | 1 |
| 14.0 | 42.7 | 297.0 | 3.8 | 280.0 | 0.3 | 11.0 | 3.0  | 7.5 | 0 |
| 10.1 | 31.2 | 217.0 | 3.8 | 182.0 | 1   | 2.3  | 3.7  | 7.1 | 1 |
| 12.3 | 37.8 | 467.0 | 4.2 | 96.0  | 0.3 | 5.0  | 3.4  | 7.5 | 1 |
| 12.5 | 37.4 | 264.0 | 4.2 | 116.0 | 0.5 | 3.9  | 1.9  | 7.4 | 0 |
| 14.4 | 41.9 | 234.0 | 4.5 | 71.0  | 0.6 | 11.0 | 3.0  | 6.9 | 1 |
| 11.9 | 38.9 | 211.0 | 4.0 | 67.0  | 0.4 | 4.0  | 1.9  | 6.7 | 0 |
| 12.8 | 39.6 | 215.0 | 4.2 | 130.0 | 0.3 | 2.6  | 2.4  | 7.2 | 0 |
| 10.0 | 32.3 | 250.0 | 4.0 | 65.0  | 0.3 | 3.6  | 1.8  | 7.1 | 0 |
| 13.6 | 42.3 | 213.0 | 4.0 | 86.0  | 0.4 | 3.4  | 2.8  | 7.9 | 0 |
| 11.2 | 33.6 | 139.0 | 2.9 | 127.0 | 0.7 | 14.0 | 23.6 | 5.2 | 3 |
| 8.4  | 28.1 | 223   | 3.8 | 54    | 0.5 | 5.0  | 5.6  | 6.6 | 1 |
| 12.3 | 37.6 | 259.0 | 4.3 | 60.0  | 0.8 | 10.0 | 3.1  | 6.6 | 1 |
| 11.8 | 36   | 264   | 4.3 | 589   | 1.3 | 3.5  | 2.0  | 6.8 | 0 |
| 10.1 | 31.2 | 136.0 | 3.9 | 146.0 | 0.3 | 5.0  | 8.2  | 6.5 | 1 |
| 13.0 | 39.1 | 477.0 | 4.0 | 47.0  | 0.7 | 5.3  | 3.6  | 6.9 | 1 |
| 12.3 | 36.0 | 259.0 | 4.4 | 45.0  | 0.5 | 5.3  | 2.4  | 7.3 | 0 |
| 11.9 | 37.7 | 395.0 | 4.5 | 82.0  | 0.3 | 6.3  | 2.5  | 7.1 | 0 |
| 11.5 | 35.1 | 176.0 | 1.5 | 841.0 | 0.7 | 1.9  | 8.1  | 4.7 | 4 |
| 13.1 | 42.4 | 332   | 3   | 85    | 0.6 | 2.5  | 1.6  | 5.6 | 1 |
| 12.8 | 39.3 | 266.0 | 4.7 | 39.0  | 0.3 | 8.0  | 1.1  | 7.5 | 0 |
| 11.3 | 35.5 | 334.0 | 4.6 | 96.0  | 0.3 | 4.7  | 1.4  | 7.5 | 0 |
| 9.8  | 29.5 | 171   | 3.8 | 144   | 0.6 | 4.0  | 2.6  | 6.3 | 0 |
| 10.7 | 32.7 | 157.0 | 3.7 | 137.0 | 0.3 | 2.5  | 2.7  | 7.3 | 0 |
| 14.0 | 43.4 | 260.0 | 3.9 | 86.0  | 0.2 | 3.6  | 2.4  | 6.9 | 0 |
| 6.5  | 21.2 | 526.0 | 2.5 | 110.0 | 0.3 | 1.5  | 3.9  | 6   | 3 |
| 10.4 | 31.7 | 400.0 | 4.1 | 53.0  | 0.3 | 3.2  | 2.3  | 7   | 0 |
| 9.4  | 29.8 | 452.0 | 3.1 | 214.0 | 0.2 | 3.0  | 3.2  | 6.9 | 2 |
| 13.6 | 41.8 | 278.0 | 3.8 | 68.0  | 0.5 | 22.0 | 2.7  | 6   | 0 |
| 9.6  | 30.5 | 363.0 | 4.0 | 51.0  | 0.3 | 5.3  | 2.8  | 6.7 | 0 |
| 10.7 | 33.3 | 410.0 | 3.6 | 208.0 | 0.4 | 3.2  | 3.1  | 6.8 | 1 |
| 11.8 | 34.7 | 183.0 | 4.2 | 105.0 | 0.3 | 3.0  | 2.3  | 6.8 | 0 |
| 11   | 34.5 | 379   | 4.1 | 61    | 0.4 | 2.3  | 6.4  | 6.4 | 1 |
| 10.1 | 31.1 | 268.0 | 3.6 | 234.0 | 0.4 | 3.3  | 13.6 | 6.2 | 2 |
| 9.4  | 30   | 206   | 3.6 | 122   | 0.4 | 3.2  | 1.7  | 6.4 | 0 |
| 12.9 | 41.5 | 237.0 | 4.2 | 65.0  | 0.4 | 7.5  | 1.9  | 6.6 | 0 |
| 13.7 | 43.2 | 560.0 | 2.9 | 191.0 | 0.3 | 4.0  | 8.6  | 6   | 3 |
| 10.0 | 31.7 | 473.0 | 3.7 | 59.0  | 0.4 | 8.0  | 3.8  | 6.8 | 1 |
| 9.9  | 29.5 | 586.0 | 3.3 | 878.0 | 1.9 | 2.5  | 4.0  | 5.6 | 2 |
| 9.9  | 31.0 | 53.0  | 3.9 | 105.0 | 0.4 | 1.8  | 15.1 | 6   | 3 |
| 9.5  | 28.7 | 227   | 4   | 110   | 0.6 | 2.0  | 3.5  | 6.6 | 2 |
| 12.2 | 36.6 | 275.0 | 3.8 | 80.0  | 0.3 | 1.3  | 3.6  | 6.4 | 2 |
| 12.9 | 40.4 | 204.0 | 4.0 | 82.0  | 0.5 | 3.1  | 2.4  | 7.1 | 0 |

|      |      |       |     |        |      |      |     |     |   |
|------|------|-------|-----|--------|------|------|-----|-----|---|
| 11.8 | 38.5 | 353   | 4.4 | 90     | 0.3  | 4.0  | 2.9 | 7.2 | 0 |
| 11.5 | 36.3 | 148.0 | 3.7 | 92.0   | 0.9  | 5.0  | 3.9 | 6.6 | 1 |
| 10.1 | 30.4 | 202.0 | 4.2 | 77.0   | 0.3  | 3.5  | 1.9 | 7   | 0 |
| 10.4 | 32.7 | 204.0 | 4.1 | 121.0  | 0.3  | 6.0  | 1.9 | 7.6 | 0 |
| 12.3 | 37.3 | 425.0 | 4.2 | 95.0   | 0.3  | 4.0  | 0.9 | 7.3 | 0 |
| 12.8 | 38.6 | 314.0 | 3.5 | 90.0   | 0.2  | 3.3  | 2.5 | 6.2 | 0 |
| 10.8 | 32.3 | 288.0 | 3.6 | 236.0  | 0.6  | 4.2  | 0.8 | 6.5 | 0 |
| 8.7  | 26.6 | 802.0 | 2.1 | 1194.0 | 5.3  | 1.3  | 6.4 | 5.2 | 4 |
| 12.5 | 36.8 | 186.0 | 4.6 | 77.0   | 0.3  | 5.2  | 1.2 | 7   | 0 |
| 10.9 | 33.2 | 161.0 | 4.5 | 189.0  | 0.5  | 6.5  | 4.8 | 6.9 | 1 |
| 10.6 | 32.6 | 822.0 | 3.4 | 551.0  | 10.3 | 2.5  | 5.5 | 6.5 | 2 |
| 8.5  | 27.6 | 97.0  | 3.1 | 87.0   | 0.7  | 3.7  | 4.5 | 6.2 | 2 |
| 12.9 | 39.0 | 291.0 | 4.5 | 90.0   | 0.3  | 3.5  | 2.1 | 7.8 | 0 |
| 12.1 | 37.0 | 182.0 | 4.2 | 68.0   | 0.9  | 2.7  | 2.9 | 6.8 | 0 |
| 11.0 | 33.3 | 174.0 | 4.2 | 124.0  | 0.3  | 2.2  | 6.2 | 7   | 2 |
| 14.4 | 44.1 | 246.0 | 4.5 | 87.0   | 0.4  | 8.7  | 2.8 | 6.9 | 0 |
| 9.7  | 31.4 | 219.0 | 4.4 | 62.0   | 0.4  | 3.7  | 3.4 | 6.7 | 1 |
| 12.4 | 39.4 | 276   | 4.2 | 832    | 1.9  | 3.1  | 3.3 | 7.7 | 1 |
| 12.0 | 36.8 | 526.0 | 4.1 | 129.0  | 0.3  | 2.0  | 2.4 | 7.1 | 2 |
| 10.9 | 34.3 | 295.0 | 4.0 | 84.0   | 0.3  | 5.0  | 3.3 | 7   | 1 |
| 11.7 | 35.5 | 224.0 | 4.6 | 102.0  | 0.4  | 2.0  | 4.4 | 6.7 | 2 |
| 10.4 | 34.7 | 647   | 3   | 380    | 0.3  | 11.5 | 3.5 | 5.6 | 2 |
| 11.9 | 35.8 | 154.0 | 4.6 | 96.0   | 0.3  | 3.8  | 2.0 | 6.7 | 0 |
| 10.3 | 31.0 | 334.0 | 3.4 | 549.0  | 0.5  | 3.0  | 6.5 | 5.6 | 3 |
| 11   | 33.1 | 144   | 3.8 | 78     | 0.4  | 10.0 | 1.5 | 7.2 | 0 |
| 8.9  | 26.6 | 67    | 3.4 | 403    | 0.6  | 9.0  | 2.2 | 6.4 | 1 |
| 10.3 | 31.9 | 394.0 | 3.8 | 110.0  | 0.4  | 1.7  | 4.8 | 6.8 | 3 |
| 13.1 | 41.2 | 216.0 | 4.3 | 125.0  | 0.9  | 3.0  | 2.5 | 8.3 | 0 |
| 8    | 24.7 | 124   | 3.3 | 52     | 0.8  | 6.0  | 2.7 | 5.6 | 1 |
| 11.6 | 34.4 | 284.0 | 4.3 | 77.0   | 0.4  | 6.8  | 2.3 | 6.8 | 0 |
| 9.4  | 28.6 | 204.0 | 4.0 | 76.0   | 0.2  | 3.5  | 2.2 | 6.7 | 0 |
| 10.4 | 32.6 | 277   | 3.6 | 98     | 0.3  | 4.6  | 1.7 | 6.4 | 0 |
| 12.8 | 37.5 | 342.0 | 4.4 | 56.0   | 0.4  | 5.0  | 3.7 | 6.8 | 1 |
| 10.9 | 36.0 | 169.0 | 3.9 | 62.0   | 0.3  | 3.7  | 2.5 | 7.3 | 0 |
| 13.8 | 41.2 | 162.0 | 4.1 | 89.0   | 0.3  | 4.0  | 0.6 | 6.3 | 0 |
| 12.6 | 39.5 | 245.0 | 4.3 | 58.0   | 0.4  | 6.0  | 3.1 | 6.9 | 1 |
| 8.7  | 27.6 | 354   | 3   | 551    | 1.3  | 2.2  | 6.5 | 7.2 | 3 |
| 12.0 | 36.4 | 233.0 | 3.9 | 94.0   | 0.2  | 2.3  | 4.3 | 6.5 | 1 |
| 8.7  | 28.5 | 408.0 | 3.1 | 86.0   | 0.3  | 1.9  | 5.6 | 6.4 | 4 |
| 12.7 | 42.2 | 242.0 | 4.8 | 54.0   | 0.8  | 3.7  | 2.5 | 7   | 0 |
| 9.8  | 31.3 | 47.0  | 3.8 | 163.0  | 0.2  | 5.7  | 8.7 | 6.4 | 2 |
| 11.4 | 33.9 | 133.0 | 2.7 | 121.0  | 2.2  | 2.3  | 5.4 | 5.6 | 2 |
| 13.1 | 38.8 | 265.0 | 4.1 | 91.0   | 0.3  | 2.8  | 2.4 | 6.8 | 0 |
| 10.8 | 31.7 | 433.0 | 3.4 | 160.0  | 0.6  | 2.0  | 5.4 | 7.9 | 3 |
| 12.1 | 35.4 | 83.0  | 4.4 | 52.0   | 0.5  | 11.0 | 2.2 | 6.4 | 0 |
| 10.9 | 34.1 | 293.0 | 4.2 | 96.0   | 0.3  | 3.5  | 4.0 | 7.9 | 1 |
| 10.3 | 32.1 | 646.0 | 3.1 | 1154.0 | 0.6  | 2.4  | 7.4 | 6.9 | 3 |

|      |      |       |     |        |      |      |      |     |   |
|------|------|-------|-----|--------|------|------|------|-----|---|
| 8.4  | 26.4 | 708.0 | 2.4 | 151.0  | 0.3  | 1.7  | 10.6 | 5.4 | 4 |
| 11.3 | 32.4 | 155.0 | 4.1 | 107.0  | 0.4  | 2.7  | 2.6  | 6.9 | 0 |
| 9.7  | 30.3 | 614.0 | 3.9 | 85.0   | 0.2  | 4.8  | 2.3  | 7.2 | 0 |
| 10.8 | 33.8 | 508.0 | 4.0 | 71.0   | 0.5  | 4.4  | 1.1  | 7.3 | 0 |
| 12.0 | 37.4 | 308.0 | 4.6 | 50.0   | 0.3  | 11.5 | 1.9  | 7.2 | 0 |
| 11.1 | 32.6 | 491.0 | 2.9 | 72.0   | 0.2  | 1.9  | 7.3  | 5.3 | 4 |
| 9.3  | 28.6 | 331   | 3.7 | 124    | 0.4  | 1.6  | 10.0 | 6.7 | 3 |
| 11.5 | 35.2 | 290.0 | 4.3 | 120.0  | 0.6  | 7.5  | 1.8  | 7.4 | 0 |
| 9.9  | 30.0 | 343.0 | 3.7 | 71.0   | 0.3  | 2.0  | 4.4  | 6.5 | 2 |
| 13.2 | 39.9 | 309.0 | 4.4 | 69.0   | 0.5  | 5.0  | 4.5  | 6.6 | 1 |
| 14.3 | 41.1 | 179.0 | 4.0 | 78.0   | 0.5  | 4.0  | 3.3  | 6.4 | 1 |
| 10.3 | 34.2 | 276.0 | 4.0 | 156.0  | 0.3  | 6.0  | 4.0  | 7.6 | 1 |
| 10.3 | 34.1 | 689   | 3.8 | 117    | 0.4  | 9.5  | 4.9  | 6.2 | 2 |
| 11.2 | 33.6 | 109.0 | 4.5 | 89.0   | 0.5  | 12.0 | 1.1  | 6.8 | 0 |
| 10.1 | 30.8 | 303.0 | 4.6 | 215.0  | 0.3  | 10.3 | 2.5  | 7   | 0 |
| 11.9 | 37.7 | 188.0 | 4.1 | 130.0  | 0.2  | 2.4  | 3.4  | 7.1 | 1 |
| 11.3 | 34.5 | 342.0 | 4.2 | 41.0   | 0.5  | 3.2  | 3.8  | 6.5 | 1 |
| 13.4 | 39.4 | 287.0 | 4.2 | 81.0   | 0.3  | 6.5  | 2.8  | 6.7 | 0 |
| 13.2 | 40.7 | 253   | 4.5 | 89     | 0.5  | 8.0  | 1.2  | 7.2 | 0 |
| 8.2  | 26.1 | 237.0 | 4.1 | 100.0  | 0.3  | 3.7  | 1.9  | 7.5 | 0 |
| 11.3 | 35.8 | 282.0 | 4.5 | 63.0   | 0.4  | 2.0  | 3.7  | 6.8 | 2 |
| 11.5 | 35.8 | 230.0 | 4.1 | 50.0   | 0.4  | 5.7  | 2.1  | 6.6 | 0 |
| 13.6 | 40   | 158   | 3.2 | 83     | 0.5  | 2.0  | 4.4  | 7.1 | 3 |
| 12.7 | 37.9 | 312.0 | 3.5 | 93.0   | 0.4  | 3.2  | 3.6  | 6.1 | 1 |
| 10.9 | 32.5 | 218.0 | 3.8 | 90.0   | 0.7  | 3.6  | 3.0  | 6.7 | 0 |
| 10   | 29.8 | 313   | 2.9 | 109    | 3.9  | 1.5  | 6.3  | 5.7 | 3 |
| 15.7 | 48.4 | 166   | 4.1 | 89     | 0.5  | 3.2  | 5.0  | 6.3 | 1 |
| 11.4 | 37.5 | 351.0 | 3.0 | 108.0  | 0.6  | 1.7  | 9.7  | 5.9 | 4 |
| 9.0  | 26.9 | 172.0 | 3.5 | 54.0   | 0.8  | 4.0  | 3.4  | 6.2 | 1 |
| 14.0 | 42.1 | 275.0 | 4.0 | 69.0   | 0.5  | 4.8  | 2.7  | 7.5 | 0 |
| 14.2 | 41.2 | 66.0  | 3.7 | 71.0   | 1.6  | 3.0  | 3.8  | 6.7 | 1 |
| 14.2 | 43.7 | 182   | 4.1 | 326    | 3.8  | 3.2  | 3.9  | 5.7 | 1 |
| 13.2 | 40.6 | 487   | 3.7 | 465    | 0.7  | 1.6  | 8.1  | 6.1 | 3 |
| 14   | 41.9 | 257   | 4.2 | 297    | 1.1  | 3.1  | 2.8  | 7.0 | 0 |
| 10.4 | 33.8 | 308.0 | 2.3 | 1087.0 | 1.1  | 9.3  | 2.9  | 5.3 | 2 |
| 12.2 | 37.4 | 229.0 | 3.6 | 108.0  | 0.4  | 4.0  | 1.4  | 6.7 | 0 |
| 13.5 | 42.4 | 138   | 3.9 | 139    | 0.8  | 2.2  | 4.3  | 6.5 | 1 |
| 14.3 | 43.3 | 331   | 4.6 | 47     | 0.6  | 11.0 | 3.4  | 6.6 | 1 |
| 15.2 | 46.6 | 311.0 | 4.4 | 160.0  | 0.8  | 2.0  | 4.9  | 6.9 | 2 |
| 14.2 | 45.1 | 293   | 4.1 | 364    | 0.3  | 14.0 | 1.6  | 7.2 | 0 |
| 10.8 | 32.8 | 223.0 | 3.3 | 201.0  | 17.7 | 1.8  | 19.9 | 5.6 | 4 |
| 12.9 | 41.0 | 407.0 | 4.1 | 238.0  | 0.5  | 16.0 | 6.2  | 7.0 | 2 |
| 14.4 | 43.2 | 277.0 | 3.4 | 209.0  | 0.9  | 1.5  | 6.2  | 5.8 | 4 |
| 11.7 | 36.1 | 162   | 3.4 | 192    | 0.7  | 2.2  | 3.5  | 5.8 | 2 |
| 14.3 | 47.3 | 307.0 | 4.4 | 70.0   | 0.4  | 4.0  | 2.8  | 6.9 | 0 |
| 12.8 | 38.3 | 272.0 | 4.4 | 44.0   | 0.6  | 5.5  | 5.6  | 7.2 | 1 |

|      |      |       |     |       |     |      |      |     |     |
|------|------|-------|-----|-------|-----|------|------|-----|-----|
| 11.2 | 35.1 | 169   | 3.8 | 197   | 1.1 | 1.8  | 5.4  | 6.4 | 3   |
| 14.4 | 45.6 | 256.0 | 3.8 | 74.0  | 0.6 | 6.3  | 2.3  | 6.3 | 0   |
| 15.0 | 46.2 | 279.0 | 3.4 | 317.0 | 1.0 | 1.8  | 9.4  | 5.6 | 4   |
| 10.9 | 33.5 | 353.0 | 3.8 | 94.0  | 0.7 | 4.3  | 2.1  | 6.0 | 0   |
| 11.1 | 35.0 | 209.0 | 3.8 | 92.0  | 0.6 | 2.4  | 2.3  | 6.2 | 0   |
| 12.9 | 40.4 | 324.0 | 4.1 | 137.0 | 6.4 | 3.3  | 2.8  | 7.3 | 0   |
| 11.5 | 36.7 | 185.0 | 4.1 | 105.0 | 0.3 | 4.8  | 2.2  | 6.7 | 0   |
| 12.7 | 39.1 | 247.0 | 3.7 | 143.0 | 0.5 | 2.3  | 4.5  | 6.6 | 1   |
| 13.3 | 41.5 | 337.0 | 4.0 | 42.0  | 0.6 | 5.3  | 2.2  | 6.3 | 0   |
| 14.6 | 43.3 | 279   | 3.1 | 84    | 1.1 | 2.4  | 2.1  | 7.2 | 1   |
| 11.1 | 35.5 | 218   | 2.9 | 116   | 1.1 | 3.6  | 4.7  | 5.9 | 3   |
| 13.7 | 42.1 | 224.0 | 4.1 | 155.0 | 1.9 | 5.0  | 4.2  | 5.7 | 2   |
| 14.2 | 41.5 | 270.0 | 4.0 | 50.0  | 0.5 | 2.6  | 2.9  | 6.3 | 0   |
| 11.4 | 4.9  | 527   | 3.4 | 86    | 0.3 | 6.5  | 10.7 | 6.1 | 3   |
| 9.9  | 30.2 | 307.0 | 2.7 | 167.0 | 9.3 | 2.3  | 9.7  | 4.7 | 3   |
| 14.7 | 44.1 | 193   | 4.1 | 284   | 2.1 | 4.0  | 5.3  | 6.5 | 1   |
| 11.4 | 35.9 | 377.0 | 3.7 | 116.0 | 0.2 | 3.8  | 2.4  | 6.0 | 0   |
| 10.6 | 33.2 | 416.0 | 3.6 | 97.0  | 0.3 | 4.7  | 3.9  | 7.0 | 1   |
| 9.6  | 30.8 | 172.0 | 4.2 | 88.0  | 0.5 | 2.7  | 3.8  | 7.2 | 1   |
| 15.1 | 43.2 | 147   | 4.2 | 110   | 0.7 | 4.0  | 1.4  | 7.8 | 0   |
| 10.4 | 34.4 | 475.0 | 3.4 | 76.0  | 0.2 | 3.4  | 3.3  | 7.0 | 3   |
| 11.7 | 35.9 | 204.0 | 3.7 | 84.0  | 0.6 | 6.7  | 1.7  | 5.7 | 0   |
| 12.3 | 37.2 | 359.0 | 3.9 | 163.0 | 1.1 | 4.5  | 3.8  | 6.6 | 1   |
| 11.3 | 35.3 | 208.0 | 3.7 | 72.0  | 1.2 | 4.0  | 2.0  | 6.2 | 0   |
| 12.9 | 38.8 | 370.0 | 4.1 | 469.0 | 0.6 | 2.0  | 3.2  | 7.7 | 2   |
| 15.9 | 49.6 | 252   | 2.6 | 158   | 0.5 | 3.2  | 4.1  | 7.4 | 2.0 |
| 13.9 | 41.4 | 344.0 | 4.3 | 308.0 | 6.6 | 1.4  | 7.8  | 6.5 | 2.0 |
| 11.6 | 37.6 | 387.0 | 3.9 | 68.0  | 0.4 | 18.0 | 2.5  | 8.1 | 0   |
| 10.8 | 33.0 | 183.0 | 3.5 | 93.0  | 0.6 | 2.8  | 2.2  | 6.1 | 0   |
| 11.1 | 33.4 | 157.0 | 4.2 | 114.0 | 0.2 | 3.5  | 4.1  | 6.9 | 1   |
| 9.6  | 31.4 | 406.0 | 3.2 | 142.0 | 1.1 | 1.2  | 11.9 | 5.7 | 4   |
| 11.6 | 35.7 | 286.0 | 2.6 | 190.0 | 1.0 | 6.7  | 4.1  | 5.7 | 3   |
| 10.9 | 34.4 | 412.0 | 4.3 | 445.0 | 1.0 | 2.7  | 9.2  | 6.8 | 2   |
| 7.9  | 26.8 | 282.0 | 4.4 | 227.0 | 0.3 | 2.0  | 4.4  | 7.5 | 2   |
| 9.5  | 30.5 | 360.0 | 3.3 | 342.0 | 0.4 | 3.7  | 2.7  | 5.8 | 1   |
| 13.8 | 41.2 | 146   | 4.4 | 72    | 0.5 | 2.4  | 4.3  | 7.2 | 1   |
| 14.7 | 45.6 | 158.0 | 3.9 | 56.0  | 0.7 | 2.3  | 1.5  | 5.9 | 0   |
| 11.4 | 36.1 | 104.0 | 3.8 | 212.0 | 1.7 | 5.0  | 3.2  | 6.6 | 1   |
| 9.7  | 30.8 | 218.0 | 3.4 | 74.0  | 0.6 | 3.0  | 1.9  | 6.8 | 1   |
| 10.0 | 31.1 | 244.0 | 4.0 | 84.0  | 0.3 | 7.7  | 2.6  | 6.8 | 0   |
| 12.3 | 37.1 | 224.0 | 4.5 | 192.0 | 0.4 | 15.0 | 47.8 | 7.3 | 2   |
| 11.5 | 35.6 | 210.0 | 4.2 | 90.0  | 0.4 | 6.8  | 1.9  | 7.2 | 0   |
| 10.9 | 32.2 | 330   | 3.5 | 341   | 7.6 | 3.7  | 1.7  | 5.5 | 0   |
| 10.2 | 31.9 | 136.0 | 4.0 | 607.0 | 0.6 | 2.3  | 6.1  | 6.4 | 1   |
| 8.7  | 27.8 | 407.0 | 3.3 | 156.0 | 0.3 | 0.8  | 9.6  | 5.4 | 4   |
| 14.6 | 45.3 | 220   | 3.5 | 161   | 0.6 | 7.2  | 1.5  | 7.2 | 0   |
| 12.7 | 40.6 | 241   | 3.4 | 227   | 0.4 | 2.8  | 5.3  | 6.5 | 2   |

|      |      |       |     |        |     |      |      |     |     |
|------|------|-------|-----|--------|-----|------|------|-----|-----|
| 9.4  | 30.8 | 445   | 3.5 | 70     | 0.3 | 17.0 | 2.5  | 7.2 | 0   |
| 11.2 | 36.3 | 283   | 3.9 | 125    | 0.4 | 2.3  | 4.2  | 6.0 | 1   |
| 9.8  | 30.4 | 188.0 | 3.5 | 429.0  | 0.6 | 1.6  | 5.9  | 6.3 | 2   |
| 12   | 35.1 | 137   | 4   | 61     | 0.5 | 9.0  | 2.4  | 6.4 | 0   |
| 12.3 | 38.4 | 89.0  | 4.8 | 132.0  | 0.4 | 3.2  | 3.2  | 7.7 | 1   |
| 11.7 | 35.1 | 180   | 4.7 | 114    | 0.7 | 4.0  | 1.8  | 6.6 | 0   |
| 9.2  | 28.0 | 453.0 | 2.8 | 491.0  | 6.0 | 2.0  | 6.7  | 6.3 | 3   |
| 12.2 | 36.9 | 312.0 | 3.2 | 1001.0 | 1.5 | 2.0  | 12.3 | 6.4 | 3   |
| 11.1 | 36.0 | 303.0 | 3.4 | 146.0  | 0.5 | 3.0  | 6.6  | 7.4 | 2   |
| 9.4  | 29.9 | 325   | 4.1 | 138    | 0.3 | 5.0  | 1.1  | 6.3 | 0   |
| 10.5 | 34.7 | 23.7  | 3.8 | 78.0   | 0.7 | 3.8  | 1.2  | 6.9 | 0   |
| 7.9  | 24.7 | 210.0 | 2.9 | 80.0   | 0.6 | 4.0  | 16.5 | 5.1 | 2   |
| 10.3 | 32.6 | 147.0 | 4.0 | 280.0  | 0.5 | 4.0  | 6.1  | 6.0 | 1   |
| 11.3 | 34.9 | 178.0 | 3.6 | 98.0   | 0.4 | 3.0  | 3.9  | 6.5 | 1   |
| 11.6 | 33.3 | 160.0 | 3.2 | 112.0  | 0.9 | 3.0  | 12.5 | 5.7 | 2   |
| 8.6  | 24.3 | 81.0  | 3.7 | 603.0  | 1.3 | 4.0  | 9.8  | 6.2 | 1   |
| 12.5 | 40.4 | 307.0 | 4.5 | 81.0   | 0.3 | 7.0  | 1.9  | 6.8 | 0   |
| 6.7  | 22.4 | 343   | 3.2 | 250    | 0.7 | 7.3  | 2.9  | 7.0 | 1   |
| 11.8 | 36.6 | 143.0 | 3.9 | 61.0   | 0.4 | 3.7  | 4.3  | 6.0 | 1   |
| 13.4 | 40.4 | 198.0 | 4.8 | 61.0   | 0.4 | 4.0  | 3.5  | 7.4 | 1   |
| 8.3  | 25.8 | 182.0 | 3.3 | 911.0  | 1.0 | 3.3  | 7.1  | 5.9 | 3   |
| 10.9 | 34.8 | 376   | 3.9 | 200    | 0.3 | 4.0  | 3.4  | 7.0 | 1.0 |
| 13.5 | 40.5 | 168.0 | 4.3 | 50.0   | 0.2 | 4.8  | 1.9  | 6.2 | 0.0 |
| 14.2 | 44.6 | 366.0 | 2.5 | 1190.0 | 3.3 | 0.9  | 9.7  | 5.5 | 4   |
| 9.7  | 29.5 | 390.0 | 3.6 | 116.0  | 0.8 | 2.0  | 11.8 | 5.8 | 3   |
| 13.1 | 40.9 | 182.0 | 4.6 | 118.0  | 0.4 | 2.5  | 2.1  | 7.1 | 0.0 |
| 12.9 | 40.2 | 347.0 | 4.2 | 99.0   | 2.2 | 8.3  | 2.8  | 6.6 | 0.0 |
| 8.9  | 27.6 | 224.0 | 2.9 | 164.0  | 0.5 | 2.0  | 5.8  | 5.4 | 3.0 |
| 8.9  | 27.5 | 212.0 | 2.8 | 207.0  | 1.1 | 3.3  | 6.7  | 5.5 | 3.0 |
| 9.0  | 28.8 | 181.0 | 3.6 | 63.0   | 0.5 | 6.0  | 3.9  | 6.0 | 1.0 |
| 9.9  | 30.6 | 234   | 3.5 | 161    | 0.5 | 5.0  | 2.8  | 7.1 | 0.0 |
| 13.0 | 40.0 | 273.0 | 4.5 | 100.0  | 0.6 | 1.2  | 9.0  | 7.2 | 2.0 |
| 9.1  | 29.1 | 240.0 | 3.9 | 69.0   | 0.4 | 6.0  | 3.1  | 6.2 | 1.0 |

| <b>Prog Fac</b>   | <b>Surv (Days)</b> | <b>WBC</b> | <b>Hgb</b> | <b>LY</b> |
|-------------------|--------------------|------------|------------|-----------|
| High Risk         | 518                | 11.8       | 11.0       | 1.9       |
| Intermediate-Risk | 3210               | 5.9        | 11.7       | 1.5       |
| Intermediate-Risk | 1610               | 4.2        | 9.2        | 1.3       |
| High Risk         | 59                 | 13.6       | 8.7        | 1.5       |
| High Risk         | 84                 | 12.2       | 11.4       | 2.1       |
| High Risk         | 20                 | 8.6        | 11.0       | 1.0       |
| Intermediate-Risk | 1455               | 8.2        | 15.4       | 1.8       |
| Intermediate-Risk | 1990               | 9.4        | 11.9       | 1.4       |
| High Risk         | 674                | 14.1       | 11.5       | 1.3       |
| Low-Risk          | 1144               | 7.3        | 14.1       | 2.0       |
| Intermediate-Risk | 100                | 18.2       | 14.0       | 2.3       |
| Low-Risk          | 2761               | 7.3        | 15.3       | 3.1       |
| Intermediate-Risk | 200                | 9.3        | 13.2       | 2.2       |
| Low-Risk          | 485                | 4.5        | 13.8       | 2.2       |
| Intermediate-Risk | 151                | 12.3       | 11.4       | 1.3       |
| Low-Risk          | 77                 | 7.0        | 11.1       | 2.2       |
| Intermediate-Risk | 1235               | 5.5        | 14.9       | 1.0       |
| Low-Risk          | 610                | 4.3        | 10.5       | 1.0       |
| Low-Risk          | 598                | 6.7        | 11.1       | 2.3       |
| Low-Risk          | 766                | 6.3        | 12.7       | 1.7       |
| Intermediate-Risk | 85                 | 6.6        | 9.6        | 1.0       |
| Intermediate-Risk | 77                 | 11.4       | 10.8       | 1.5       |
| High Risk         | 281                | 7.3        | 11.4       | 1.0       |
| Intermediate-Risk | 15                 | 7.3        | 10.9       | 1.3       |
| Intermediate-Risk | 2547               | 19.1       | 10.1       | 1.5       |
| Intermediate-Risk | 281                | 11.5       | 11.8       | 2.1       |
| Intermediate-Risk | 268                | 4.0        | 11.7       | 0.7       |
| Low-Risk          | 2323               | 5.9        | 13.6       | 1.7       |
| Intermediate-Risk | 431                | 5.0        | 12.8       | 0.7       |
| Low-Risk          | 1820               | 6.8        | 12.9       | 1.8       |
| High Risk         | 67                 | 11.5       | 12.0       | 0.9       |
| Low-Risk          | 1724               | 5.8        | 13.6       | 2.2       |
| Low-Risk          | 1595               | 5.9        | 9.8        | 1.6       |
| High Risk         | 47                 | 10.6       | 9.4        | 1.1       |
| Low-Risk          | 2144               | 4.3        | 11.1       | 1.6       |
| Intermediate-Risk | 265                | 8.7        | 12.5       | 1.4       |
| Intermediate-Risk | 548                | 7.9        | 8.6        | 1.6       |
| Low-Risk          | 1685               | 5.7        | 11.6       | 1.9       |
| High Risk         | 208                | 14.6       | 10.7       | 3.2       |
| Intermediate-Risk | 1051               | 6.0        | 9.9        | 1.2       |
| Intermediate-Risk | 546                | 9.6        | 12.8       | 2.0       |
| Low-Risk          | 201                | 10.3       | 12.1       | 2.6       |
| Low-Risk          | 2079               | 10.0       | 12.3       | 2.9       |
| Intermediate-Risk | 297                | 8.7        | 10.8       | 1.7       |
| Intermediate-Risk | 220                | 8.7        | 14.9       | 2.0       |

|                   |      |      |      |     |
|-------------------|------|------|------|-----|
| Intermediate-Risk | 1891 | 10.0 | 14.0 | 1.6 |
| Intermediate-Risk | 887  | 8.0  | 12.2 | 1.1 |
| Low-Risk          | 1724 | 7.4  | 11.5 | 2.2 |
| Intermediate-Risk | 155  | 9.2  | 12.0 | 1.6 |
| High Risk         | 120  | 12.6 | 11.4 | 1.7 |
| Low-Risk          | 321  | 5.5  | 15.1 | 2.2 |
| Intermediate-Risk | 400  | 7.7  | 11.5 | 1.3 |
| Low-Risk          | 963  | 5.5  | 14.2 | 2.3 |
| Low-Risk          | 214  | 5.2  | 12.3 | 1.2 |
| Low-Risk          | 268  | 5.4  | 13.2 | 1.7 |
| Low-Risk          | 635  | 6.3  | 13.0 | 2.1 |
| Intermediate-Risk | 87   | 8.0  | 10.1 | 1.3 |
| Intermediate-Risk | 108  | 5.6  | 12.5 | 0.6 |
| High Risk         | 1707 | 7.5  | 12.1 | 1.0 |
| High Risk         | 118  | 9.6  | 9.9  | 1.3 |
| Low-Risk          | 1046 | 10.6 | 11.1 | 3.8 |
| Low-Risk          | 353  | 6.2  | 12.0 | 1.5 |
| High Risk         | 75   | 7.0  | 11.0 | 0.7 |
| Intermediate-Risk | 98   | 5.7  | 11.1 | 0.8 |
| Low-Risk          | 304  | 11.6 | 11.5 | 3.5 |
| Intermediate-Risk | 153  | 8.9  | 12.7 | 1.4 |
| Low-Risk          | 652  | 6.4  | 13.8 | 1.6 |
| Intermediate-Risk | 221  | 5.1  | 13.0 | 1.1 |
| Intermediate-Risk | 1152 | 7.4  | 15.1 | 1.2 |
| Intermediate-Risk | 872  | 11.3 | 16.0 | 2.1 |
| Intermediate-Risk | 273  | 3.2  | 11.2 | 0.6 |
| High Risk         | 365  | 9.3  | 10.1 | 1.6 |
| High Risk         | 1973 | 22.0 | 8.5  | 2.9 |
| Intermediate-Risk | 782  | 7.1  | 12.0 | 1.3 |
| Intermediate-Risk | 1968 | 6.8  | 11.5 | 1.6 |
| Low-Risk          | 1758 | 3.8  | 9.8  | 1.0 |
| High Risk         | 186  | 18.8 | 10.8 | 2.6 |
| Intermediate-Risk | 369  | 3.9  | 9.9  | 0.9 |
| Low-Risk          | 387  | 4.3  | 11.9 | 1.0 |
| Low-Risk          | 410  | 6.7  | 12.8 | 1.7 |
| Low-Risk          | 195  | 4.5  | 13.4 | 1.3 |
| Low-Risk          | 328  | 3.1  | 9.9  | 1.6 |
| High Risk         | 785  | 16.0 | 11.6 | 2.4 |
| Intermediate-Risk | 233  | 7.4  | 11.8 | 1.0 |
| Intermediate-Risk | 189  | 9.0  | 7.0  | 1.8 |
| Intermediate-Risk | 621  | 4.0  | 12.8 | 0.9 |
| Intermediate-Risk | 200  | 6.5  | 12.0 | 1.2 |
| Intermediate-Risk | 96   | 8.0  | 13.0 | 1.7 |



|                   |      |      |      |     |
|-------------------|------|------|------|-----|
| Low-Risk          | 501  | 5.5  | 11.4 | 1.7 |
| High Risk         | 185  | 7.5  | 11.4 | 1.4 |
| Intermediate-Risk | 491  | 8.1  | 12.1 | 1.7 |
| Intermediate-Risk | 363  | 6.0  | 12.5 | 1.3 |
| Low-Risk          | 3289 | 8.9  | 14.0 | 2.2 |
| Intermediate-Risk | 706  | 4.5  | 10.1 | 0.9 |
| Intermediate-Risk | 242  | 6.9  | 12.3 | 1.5 |
| Low-Risk          | 1333 | 8.6  | 12.5 | 2.7 |
| Intermediate-Risk | 1694 | 9.0  | 14.4 | 2.2 |
| Low-Risk          | 546  | 5.1  | 11.9 | 1.6 |
| Low-Risk          | 813  | 6.8  | 12.8 | 1.8 |
| Low-Risk          | 2171 | 7.6  | 10.0 | 2.5 |
| Low-Risk          | 123  | 7.0  | 13.6 | 1.7 |
| High Risk         | 6    | 13.6 | 11.2 | 1.4 |
| Intermediate-Risk | 141  | 6.8  | 8.4  | 1.0 |
| Intermediate-Risk | 335  | 3.0  | 12.3 | 1.0 |
| Low-Risk          | 117  | 4.6  | 11.8 | 1.4 |
| Intermediate-Risk | 774  | 4.7  | 10.1 | 0.5 |
| Intermediate-Risk | 1032 | 9.8  | 13.0 | 2.1 |
| Low-Risk          | 353  | 5.7  | 12.3 | 1.6 |
| Low-Risk          | 131  | 7.2  | 11.9 | 1.9 |
| High Risk         | 31   | 16.3 | 11.5 | 1.7 |
| Intermediate-Risk | 140  | 8.1  | 13.1 | 2.7 |
| Low-Risk          | 3912 | 2.7  | 12.8 | 1.6 |
| Low-Risk          | 71   | 3.7  | 11.3 | 1.4 |
| Low-Risk          | 514  | 3.1  | 9.8  | 0.8 |
| Low-Risk          | 2550 | 8.2  | 10.7 | 2.0 |
| Low-Risk          | 2926 | 6.5  | 14.0 | 1.8 |
| High Risk         | 246  | 8.3  | 6.5  | 1.5 |
| Low-Risk          | 455  | 5.8  | 10.4 | 1.6 |
| Intermediate-Risk | 570  | 9.5  | 9.4  | 2.1 |
| Low-Risk          | 131  | 8.3  | 13.6 | 2.2 |
| Low-Risk          | 417  | 6.3  | 9.6  | 1.6 |
| Intermediate-Risk | 392  | 8.4  | 10.7 | 1.9 |
| Low-Risk          | 331  | 3.4  | 11.8 | 0.9 |
| Intermediate-Risk | 98   | 7.2  | 11.0 | 0.9 |
| Intermediate-Risk | 23   | 19.4 | 10.1 | 1.3 |
| Low-Risk          | 1379 | 14.1 | 9.4  | 1.9 |
| Low-Risk          | 414  | 9.1  | 12.9 | 3.0 |
| High Risk         | 258  | 11.8 | 13.7 | 1.2 |
| Intermediate-Risk | 437  | 7.9  | 10.0 | 1.6 |
| Intermediate-Risk | 92   | 5.5  | 9.9  | 1.0 |
| High Risk         | 463  | 23.3 | 9.9  | 1.4 |
| Intermediate-Risk | 1226 | 2.9  | 9.5  | 0.6 |
| Intermediate-Risk | 709  | 2.5  | 12.2 | 0.5 |
| Low-Risk          | 317  | 7.5  | 12.9 | 2.2 |

|                   |      |      |      |     |
|-------------------|------|------|------|-----|
| Low-Risk          | 84   | 6.4  | 11.8 | 1.6 |
| Intermediate-Risk | 709  | 7.6  | 11.5 | 1.5 |
| Low-Risk          | 746  | 4.5  | 10.1 | 1.4 |
| Low-Risk          | 110  | 5.6  | 10.4 | 1.8 |
| Low-Risk          | 493  | 1.7  | 12.3 | 0.8 |
| Low-Risk          | 139  | 4.6  | 12.8 | 1.3 |
| Low-Risk          | 156  | 3.0  | 10.8 | 2.5 |
| High Risk         | 105  | 11.5 | 8.7  | 1.4 |
| Low-Risk          | 2223 | 6.2  | 12.5 | 2.6 |
| Intermediate-Risk | 421  | 7.7  | 10.9 | 1.3 |
| Intermediate-Risk | 528  | 7.0  | 10.6 | 1.0 |
| Intermediate-Risk | 40   | 6.4  | 8.5  | 1.1 |
| Low-Risk          | 1835 | 7.1  | 12.9 | 2.1 |
| Low-Risk          | 516  | 8.2  | 12.1 | 1.9 |
| Intermediate-Risk | 597  | 10.0 | 11.0 | 1.3 |
| Low-Risk          | 1316 | 10.1 | 14.4 | 2.6 |
| Intermediate-Risk | 335  | 5.0  | 9.7  | 1.1 |
| Intermediate-Risk | 1255 | 10.1 | 12.4 | 2.2 |
| Intermediate-Risk | 34   | 14.8 | 12.0 | 3.8 |
| Intermediate-Risk | 285  | 6.8  | 10.9 | 1.5 |
| Intermediate-Risk | 465  | 4.7  | 11.7 | 0.8 |
| Intermediate-Risk | 1527 | 10.6 | 10.4 | 2.3 |
| Low-Risk          | 414  | 4.9  | 11.9 | 1.5 |
| High Risk         | 604  | 11.2 | 10.3 | 1.5 |
| Low-Risk          | 239  | 2.5  | 11.0 | 1.0 |
| Intermediate-Risk | 1118 | 3.0  | 8.9  | 0.9 |
| High Risk         | 124  | 12.0 | 10.3 | 1.9 |
| Low-Risk          | 82   | 8.0  | 13.1 | 2.1 |
| Intermediate-Risk | 39   | 2.4  | 8.0  | 0.6 |
| Low-Risk          | 239  | 9.5  | 11.6 | 2.7 |
| Low-Risk          | 253  | 4.8  | 9.4  | 1.4 |
| Low-Risk          | 387  | 9.3  | 10.4 | 3.2 |
| Intermediate-Risk | 342  | 7.4  | 12.8 | 1.5 |
| Low-Risk          | 385  | 4.0  | 10.9 | 1.1 |
| Low-Risk          | 812  | 2.8  | 13.8 | 1.6 |
| Intermediate-Risk | 771  | 5.0  | 12.6 | 1.2 |
| High Risk         | 1365 | 15.8 | 8.7  | 2.0 |
| Intermediate-Risk | 254  | 4.0  | 12.0 | 0.7 |
| High Risk         | 44   | 12.1 | 8.7  | 1.7 |
| Low-Risk          | 1377 | 4.2  | 12.7 | 1.1 |
| Intermediate-Risk | 215  | 34.4 | 9.8  | 3.4 |
| Intermediate-Risk | 22   | 4.8  | 11.4 | 0.7 |
| Low-Risk          | 231  | 5.4  | 13.1 | 1.4 |
| High Risk         | 251  | 8.3  | 10.8 | 1.2 |
| Low-Risk          | 670  | 3.6  | 12.1 | 1.1 |
| Intermediate-Risk | 370  | 7.4  | 10.9 | 1.4 |
| High Risk         | 115  | 15.2 | 10.3 | 1.7 |

|                   |      |      |      |     |
|-------------------|------|------|------|-----|
| High Risk         | 68   | 18.4 | 8.4  | 1.5 |
| Low-Risk          | 103  | 6.0  | 11.3 | 1.6 |
| Low-Risk          | 1495 | 6.7  | 9.7  | 1.9 |
| Low-Risk          | 677  | 8.1  | 10.8 | 3.5 |
| Low-Risk          | 400  | 6.9  | 12.0 | 2.3 |
| High Risk         | 206  | 15.0 | 11.1 | 1.7 |
| High Risk         | 479  | 24.5 | 9.3  | 2.1 |
| Low-Risk          | 726  | 4.5  | 11.5 | 1.5 |
| Intermediate-Risk | 489  | 4.6  | 9.9  | 0.8 |
| Intermediate-Risk | 547  | 5.7  | 13.2 | 1.0 |
| Intermediate-Risk | 767  | 7.2  | 14.3 | 1.6 |
| Intermediate-Risk | 1205 | 5.5  | 10.3 | 1.2 |
| Intermediate-Risk | 131  | 11.5 | 10.3 | 1.9 |
| Low-Risk          | 2725 | 2.1  | 11.2 | 1.2 |
| Low-Risk          | 326  | 11.8 | 10.1 | 3.1 |
| Intermediate-Risk | 153  | 8.2  | 11.9 | 1.7 |
| Intermediate-Risk | 350  | 9.8  | 11.3 | 1.9 |
| Low-Risk          | 1164 | 5.0  | 13.4 | 1.3 |
| Low-Risk          | 1248 | 7.5  | 13.2 | 3.2 |
| Low-Risk          | 434  | 3.2  | 8.2  | 1.1 |
| Intermediate-Risk | 311  | 7.6  | 11.3 | 1.2 |
| Low-Risk          | 898  | 5.5  | 11.5 | 1.7 |
| High Risk         | 414  | 9.5  | 13.6 | 1.6 |
| Intermediate-Risk | 276  | 7.9  | 12.7 | 1.6 |
| Low-Risk          | 43   | 7.7  | 10.9 | 1.8 |
| High Risk         | 54   | 9.3  | 10.0 | 1.2 |
| Intermediate-Risk | 2522 | 10.1 | 15.7 | 1.6 |
| High Risk         | 36   | 16.9 | 11.4 | 1.5 |
| Intermediate-Risk | 75   | 5.6  | 9.0  | 1.2 |
| Low-Risk          | 608  | 7.5  | 14.0 | 1.9 |
| Intermediate-Risk | 368  | 6.1  | 14.2 | 1.2 |
| Intermediate-Risk | 136  | 8.2  | 14.2 | 1.6 |
| High Risk         | 75   | 13.7 | 13.2 | 1.4 |
| Low-Risk          | 409  | 11.4 | 14.0 | 2.8 |
| Intermediate-Risk | 33   | 15.0 | 10.4 | 3.7 |
| Low-Risk          | 188  | 4.3  | 12.2 | 1.6 |
| Intermediate-Risk | 306  | 6.3  | 13.5 | 1.1 |
| Intermediate-Risk | 327  | 9.8  | 14.3 | 2.2 |
| Intermediate-Risk | 766  | 9.0  | 15.2 | 1.4 |
| Low-Risk          | 516  | 7.4  | 14.2 | 2.8 |
| High Risk         | 14   | 15.0 | 10.8 | 0.7 |
| Intermediate-Risk | 211  | 11.6 | 12.9 | 1.6 |
| High Risk         | 107  | 12.6 | 14.4 | 1.7 |
| Intermediate-Risk | 583  | 6.4  | 11.7 | 1.3 |
| Low-Risk          | 1045 | 11.4 | 14.3 | 2.8 |
| Intermediate-Risk | 1939 | 7.6  | 12.8 | 1.1 |

|                   |      |      |      |     |
|-------------------|------|------|------|-----|
| High Risk         | 19   | 11.2 | 11.2 | 1.6 |
| Low-Risk          | 416  | 8.6  | 14.4 | 2.5 |
| High Risk         | 57   | 15.3 | 15.0 | 1.4 |
| Low-Risk          | 1142 | 4.3  | 10.9 | 1.3 |
| Low-Risk          | 566  | 4.4  | 11.1 | 1.2 |
| Low-Risk          | 392  | 8.2  | 12.9 | 2.0 |
| Low-Risk          | 796  | 6.5  | 11.5 | 1.9 |
| Intermediate-Risk | 682  | 8.3  | 12.7 | 1.4 |
| Low-Risk          | 385  | 5.4  | 13.3 | 1.6 |
| Intermediate-Risk | 525  | 8.3  | 14.6 | 2.2 |
| High Risk         | 46   | 10.9 | 11.1 | 1.8 |
| Intermediate-Risk | 50   | 10.8 | 13.7 | 2.0 |
| Low-Risk          | 240  | 5.6  | 14.2 | 1.3 |
| High Risk         | 117  | 15.4 | 11.4 | 1.3 |
| High Risk         | 21   | 10.0 | 9.9  | 0.9 |
| Intermediate-Risk | 334  | 7.7  | 14.7 | 1.2 |
| Low-Risk          | 422  | 6.9  | 11.4 | 1.9 |
| Intermediate-Risk | 91   | 7.2  | 10.6 | 1.4 |
| Intermediate-Risk | 2240 | 4.1  | 9.6  | 0.8 |
| Low-Risk          | 94   | 7.4  | 15.1 | 2.8 |
| High Risk         | 43   | 14.2 | 10.4 | 3.1 |
| Low-Risk          | 59   | 5.6  | 11.7 | 2.0 |
| Intermediate-Risk | 499  | 9.1  | 12.3 | 1.8 |
| Low-Risk          | 2137 | 3.9  | 11.3 | 1.2 |
| Intermediate-Risk | 710  | 6.6  | 12.9 | 1.4 |
| Intermediate-Risk | 291  | 10.2 | 15.9 | 1.9 |
| Intermediate-Risk | 645  | 9.5  | 13.9 | 1.0 |
| Low-Risk          | 565  | 6.4  | 11.6 | 1.8 |
| Low-Risk          | 219  | 6.3  | 10.8 | 1.7 |
| Intermediate-Risk | 166  | 7.6  | 11.1 | 1.4 |
| High Risk         | 43   | 9.5  | 9.6  | 0.7 |
| High Risk         | 62   | 10.4 | 11.6 | 2.0 |
| Intermediate-Risk | 189  | 16.9 | 10.9 | 1.6 |
| Intermediate-Risk | 129  | 7.1  | 7.9  | 1.2 |
| Intermediate-Risk | 174  | 8.8  | 9.5  | 2.2 |
| Intermediate-Risk | 201  | 7.0  | 13.8 | 1.2 |
| Low-Risk          | 106  | 5.1  | 14.7 | 2.3 |
| Intermediate-Risk | 1335 | 4.4  | 11.4 | 1.0 |
| Intermediate-Risk | 14   | 2.9  | 9.7  | 0.9 |
| Low-Risk          | 1043 | 8.7  | 10.0 | 2.3 |
| Intermediate-Risk | 352  | 73.3 | 12.3 | 1.5 |
| Low-Risk          | 2303 | 8.1  | 11.5 | 2.7 |
| Low-Risk          | 251  | 3.3  | 10.9 | 1.1 |
| Intermediate-Risk | 86   | 6.9  | 10.2 | 0.9 |
| High Risk         | 28   | 12.5 | 8.7  | 0.9 |
| Low-Risk          | 555  | 9.5  | 14.6 | 3.6 |
| Intermediate-Risk | 193  | 7.4  | 12.7 | 1.1 |

|                   |      |      |      |     |
|-------------------|------|------|------|-----|
| Low-Risk          | 164  | 6.0  | 9.4  | 1.7 |
| Intermediate-Risk | 280  | 7.9  | 11.2 | 1.4 |
| Intermediate-Risk | 151  | 6.4  | 9.8  | 0.8 |
| Low-Risk          | 1983 | 3.3  | 12.0 | 0.9 |
| Intermediate-Risk | 436  | 8.6  | 12.3 | 1.9 |
| Low-Risk          | 3289 | 4.8  | 11.7 | 1.6 |
| High Risk         | 19   | 8.2  | 9.2  | 1.0 |
| High Risk         | 85   | 8.3  | 12.2 | 0.6 |
| Intermediate-Risk | 287  | 7.1  | 11.1 | 0.9 |
| Low-Risk          | 813  | 4.5  | 9.4  | 2.0 |
| Low-Risk          | 390  | 4.6  | 10.5 | 1.9 |
| Intermediate-Risk | 171  | 7.1  | 7.9  | 0.4 |
| Intermediate-Risk | 280  | 5.9  | 10.3 | 0.8 |
| Intermediate-Risk | 413  | 6.3  | 11.3 | 1.2 |
| Intermediate-Risk | 15   | 8.3  | 11.6 | 0.6 |
| Intermediate-Risk | 147  | 4.3  | 8.6  | 0.4 |
| Low-Risk          | 488  | 4.4  | 12.5 | 1.4 |
| Intermediate-Risk | 40   | 9.2  | 6.7  | 2.2 |
| Intermediate-Risk | 372  | 6.1  | 11.8 | 1.1 |
| Intermediate-Risk | 379  | 7.6  | 13.4 | 1.6 |
| High Risk         | 14   | 10.9 | 8.3  | 1.3 |
| Intermediate-Risk | 479  | 9.3  | 10.9 | 2.0 |
| Low-Risk          | 279  | 6.0  | 13.5 | 1.9 |
| High Risk         | 29   | 15.4 | 14.2 | 1.3 |
| High Risk         | 23   | 23.9 | 9.7  | 1.8 |
| Low-Risk          | 1    | 6.9  | 13.1 | 2.0 |
| Low-Risk          | 366  | 9.9  | 12.9 | 2.5 |
| High Risk         | 34   | 7.3  | 8.9  | 1.0 |
| High Risk         | 688  | 26.5 | 8.9  | 3.3 |
| Intermediate-Risk | 151  | 9.2  | 9.0  | 1.8 |
| Low-Risk          | 172  | 3.9  | 9.9  | 1.0 |
| Intermediate-Risk | 1074 | 6.5  | 13.0 | 0.6 |
| Intermediate-Risk | 103  | 5.1  | 9.1  | 1.2 |
